# Supplementary material for: Efficacy and safety of the pulsed electromagnetic field in osteoarthritis: a meta-analysis
Source: PubMed Central journal article supplement — BMJ Open. 2018 Dec 14;8(12):e022879. doi: 10.1136/bmjopen-2018-022879 (PMC6303578; doi:10.1136/bmjopen-2018-022879), 2018-12-14
Supplement: bmjopen-2018-022879.draft_revisions.pdf [file bmjopen-2018-022879.draft_revisions.pdf]

# BMJ Open

BMJ Open is committed to open peer review. As part of this commitment we make the peer review history of every article we publish publicly available.

When an article is published we post the peer reviewers' comments and the authors' responses online. We also post the versions of the paper that were used during peer review. These are the versions that the peer review comments apply to.

The versions of the paper that follow are the versions that were submitted during the peer review process. They are not the versions of record or the final published versions. They should not be cited or distributed as the published version of this manuscript.

BMJ Open is an open access journal and the full, final, typeset and author-corrected version of record of the manuscript is available on our site with no access controls, subscription charges or pay-per-view fees (<http://bmjopen.bmj.com>).

If you have any questions on BMJ Open's open peer review process please email [info.bmjopen@bmj.com](mailto:info.bmjopen@bmj.com)

# BMJ Open

## Efficacy and Safety of the Pulsed Electromagnetic Field in Osteoarthritis: A Meta-analysis

|                               |                                                                                                                                                                                                                                                                                                                                                                                                                                                                                                                                                                                                                                                                                                                                                                                                                                                                                                                                                                                                                                                                                                                                                                                                          |
|-------------------------------|----------------------------------------------------------------------------------------------------------------------------------------------------------------------------------------------------------------------------------------------------------------------------------------------------------------------------------------------------------------------------------------------------------------------------------------------------------------------------------------------------------------------------------------------------------------------------------------------------------------------------------------------------------------------------------------------------------------------------------------------------------------------------------------------------------------------------------------------------------------------------------------------------------------------------------------------------------------------------------------------------------------------------------------------------------------------------------------------------------------------------------------------------------------------------------------------------------|
| Journal:                      | <i>BMJ Open</i>                                                                                                                                                                                                                                                                                                                                                                                                                                                                                                                                                                                                                                                                                                                                                                                                                                                                                                                                                                                                                                                                                                                                                                                          |
| Manuscript ID                 | bmjopen-2018-022879                                                                                                                                                                                                                                                                                                                                                                                                                                                                                                                                                                                                                                                                                                                                                                                                                                                                                                                                                                                                                                                                                                                                                                                      |
| Article Type:                 | Research                                                                                                                                                                                                                                                                                                                                                                                                                                                                                                                                                                                                                                                                                                                                                                                                                                                                                                                                                                                                                                                                                                                                                                                                 |
| Date Submitted by the Author: | 18-Mar-2018                                                                                                                                                                                                                                                                                                                                                                                                                                                                                                                                                                                                                                                                                                                                                                                                                                                                                                                                                                                                                                                                                                                                                                                              |
| Complete List of Authors:     | <p>Wu, Ziyang; Xiangya Hospital Central South University, Department of Orthopaedics<br/> Ding, Xiang; Xiangya Hospital Central South University, Department of Orthopaedics<br/> Lei, Guanghua; Xiangya Hospital Central South University, Department of Orthopaedics<br/> Zeng, Chao; Xiangya Hospital Central South University, Department of Orthopaedics<br/> Wei, Jie; Xiangya Hospital Central South University, Health Management Center; Central South University Xiangya School of Public Health, Department of Epidemiology and Health Statistics<br/> Li, Jiatian; Xiangya Hospital Central South University, Department of Orthopaedics<br/> Li, Hui; Xiangya Hospital Central South University, Department of Orthopaedics<br/> Yang, Tuo; Xiangya Hospital Central South University, Health Management Center<br/> Cui, Yang; Xiangya Hospital Central South University, International Medical Department<br/> Xiong, Yilin; Xiangya Hospital Central South University, Department of Orthopaedics<br/> Wang, Yilun; Xiangya Hospital Central South University, Department of Orthopaedics<br/> Xie, Dongxing; Xiangya Hospital, Central South University, Department of Orthopaedics</p> |
| Keywords:                     | osteoarthritis, pulsed electromagnetic field, meta-analysis, randomized controlled trial                                                                                                                                                                                                                                                                                                                                                                                                                                                                                                                                                                                                                                                                                                                                                                                                                                                                                                                                                                                                                                                                                                                 |
|                               |                                                                                                                                                                                                                                                                                                                                                                                                                                                                                                                                                                                                                                                                                                                                                                                                                                                                                                                                                                                                                                                                                                                                                                                                          |

SCHOLARONE™  
Manuscripts

1  
2  
3  
4  
5 **1 Efficacy and Safety of the Pulsed Electromagnetic Field in Osteoarthritis: A Meta-analysis**

6  
7  
8 2 Ziyong Wu<sup>1†</sup>, Xiang Ding<sup>1†</sup>, Guanghua Lei<sup>1</sup>, Chao Zeng<sup>1</sup>, Jie Wei<sup>2,3</sup>, Jiatian Li<sup>1</sup>, Hui Li<sup>1</sup>, Tuo Yang<sup>2</sup>,  
9  
10 3 Yang Cui<sup>4</sup>, Yilin Xiong<sup>1</sup>, Yilun Wang<sup>1\*</sup>, Dongxing Xie<sup>1\*</sup>

11  
12 4 <sup>1</sup>Department of Orthopaedics, Xiangya Hospital, Central South University, Changsha, Hunan Province,  
13  
14 5 China, 410008;

15  
16 6 <sup>2</sup>Health Management Center, Xiangya Hospital, Central South University, Changsha, Hunan Province,  
17  
18 7 China. 410008;

19  
20 8 <sup>3</sup>Department of Epidemiology and Health Statistics, Xiangya School of Public Health, Central South  
21  
22 9 University, Changsha, Hunan Province, China, 410008;

23  
24 10 <sup>4</sup>International Medical Department, Xiangya Hospital, Central South University, Changsha, Hunan  
25  
26 11 Province, China, 410008.

27  
28 12 †Ziyong Wu and Xiang Ding contributed equally to this article.

29  
30  
31 13 **Email address:** Ziyong Wu: wuziyong@csu.edu.cn; Xiang Ding: dingxiang@csu.edu.cn; Guanghua Lei:  
32  
33 14 lei\_guanghua@csu.edu.cn; Chao Zeng: zengchao@csu.edu.cn; Jie Wei: weij1988@csu.edu.cn; Jiatian  
34  
35 15 Li: lijiatian@csu.edu.cn; Hui Li: doctorl@csu.edu.cn; Tuo Yang: 693673464@qq.com; Yang Cui:  
36  
37 16 834492077@qq.com; Yilin Xiong: xiongyilin@csu.edu.cn; Yilun Wang: yilun\_Wang@csu.edu.cn;  
38  
39 17 Dongxing Xie: xdx1024@csu.edu.cn

40  
41  
42 18 **Correspondence to:** Dongxing Xie, MD, PhD, Department of Orthopaedics, Xiangya Hospital,  
43  
44 19 Central South University, #87 Xiangya Road, Changsha, Hunan, China, 410008. E-mail:  
45  
46 20 xdx1024@csu.edu.cn; Yilun Wang, MD, PhD, Department of Orthopaedics, Xiangya Hospital, Central  
47  
48 21 South University, #87 Xiangya Road, Changsha, Hunan, China, 410008. E-mail:  
49  
50 22 yilun\_Wang@csu.edu.cn

1  
2  
3  
4  
5  
6  
7  
8  
9  
10  
11  
12  
13  
14  
15  
16  
17  
18  
19  
20  
21  
22  
23 **Abstract**

24 **Objective:** To investigate the efficacy and safety of the pulsed electromagnetic field (PEMF) therapy in  
25 treating osteoarthritis (OA).

26 **Methods:** Relevant studies were identified by searching the database of PubMed, Embase, the  
27 Cochrane Library and Web of Science. Randomized controlled trials (RCTs) comparing PEMF with  
28 sham-control were included.

29 **Results:** Twelve trials (n=770) comparing PEMF with sham-control were included, among which ten  
30 trials involved knee OA, two involved cervical OA and one involved hand OA. The PEMF group  
31 showed more significant pain alleviation than the sham group in knee OA (SMD = -0.54, 95% CI:  
32 -1.04, -0.04,  $P = 0.03$ ) and hand OA (SMD = -2.85, 95% CI: -3.65, -2.04,  $P < 0.00001$ ), but not in  
33 cervical OA. Similarly, comparing with the sham-control treatment, significant function improvement  
34 was observed in the PEMF group in both knee and hand OA patients (SMD = -0.34, 95%CI: -0.53,  
35 -0.14,  $P = 0.0006$ , and SMD = -1.49, 95%CI: -2.12, -0.86,  $P < 0.00001$ , respectively), but not in  
36 cervical OA patients. Sensitivity analyses suggested that the exposure duration  $\leq 30$  minutes per  
37 session exhibited better effects compared with the exposure duration  $> 30$  minutes per session. Three  
38 trials reported adverse events, and the combined results showed that there was no significant difference  
39 between PEMF and the sham group.

40 **Conclusions:** The present study revealed that PEMF could alleviate pain and improve physical  
41 function for knee and hand OA patients, but not for cervical OA patients. Meanwhile, a short PEMF  
42 treatment duration (within 30 minutes) may achieve more favorable efficacy.

43 **Level of Evidence:** Level I, meta-analysis

44 **Key words:** osteoarthritis, pulsed electromagnetic field, meta-analysis, randomized controlled trial

1  
2  
3  
4  
5 **45 Strengths and limitations of this study**

6 46 1. This study provided a comprehensive assessment on the efficacy and safety of the pulsed  
7  
8 47 electromagnetic field (PEMF) therapy in patients with knee, hand and cervical osteoarthritis (OA).

9  
10 48 2. All included studies in this meta-analysis were randomised controlled trials.

11  
12 49 3. There was a high level of heterogeneity among various studies, because different treatment protocols  
13  
14 50 of PEMF were used in the included studies.

15  
16 51 4. There were sparse eligible trials available for the efficacy analysis of hand OA and cervical OA, and  
17  
18 52 the reliability of the conclusions on these two joints were limited.

## 53 INTRODUCTION

54 Osteoarthritis (OA) is a widespread degenerative disease, which can lead to pain, physical dysfunction  
55 and even disability. The joints most commonly affected by OA include knees, hips, hands, neck, and  
56 feet.<sup>1 2</sup> A variety of medications and physical therapies have been used in the treatment of OA.  
57 However, some widely-applied drugs (e.g., chondroitin, glucosamine, intraarticular hyaluronic acid,  
58 etc.) or physical treatments (e.g., transcutaneous electrical nerve stimulation, and ultrasound) are  
59 actually not advocated by the recent Osteoarthritis Research Society International (OARSI) guidelines.<sup>3</sup>  
60 To date, few effective treatments for knee OA are available.

61 Since the early 1980s, researchers have found that pulsed electromagnetic field (PEMF) therapy  
62 could be applied to accelerate wound healing, repair fracture, reduce hematoma, and treat soft tissue  
63 injury and inflammation.<sup>4</sup> In addition, some studies have demonstrated that PEMF could activate the  
64 signal transduction pathway<sup>5-7</sup> and induce the human articular chondrocyte proliferation.<sup>8</sup> Being a  
65 simple, noninvasive and safe physical therapy, PEMF was considered to be an alternative treatment  
66 regimen for OA. During the past two decades, more than ten randomized controlled trials (RCTs) were  
67 conducted to explore the efficacy of PEMF in the treatment of OA, but no consensus was reached  
68 yet.<sup>9-22</sup> Several previous meta-analyses have evaluated the combined effects of PEMF and pulsed  
69 electrical stimulation on OA.<sup>23 24</sup> However, the mechanisms of PEMF and pulsed electrical stimulation  
70 are totally different. For example, PES is delivered through capacitive coupling using transcutaneous  
71 electrodes and coupling agents<sup>25</sup> relying on the direct application of an electrical field; whereas PEMF  
72 creates induced current through magnetic impulse.<sup>24</sup> To the best of our knowledge, few meta-analyses  
73 have evaluated the efficacy and safety of single PEMF for OA.

74 To fill in this knowledge gap, the purpose of the present study was to provide a comprehensive  
75 assessment on the efficacy and safety of single PEMF in patients with OA at different joints. It was  
76 hypothesized that PEMF could relieve pain and improve the physical function of OA patients without  
77 producing side effects.

## 79 METHODS

### 80 Search strategies and studies selection

81 The study records were identified in four electronic databases of PubMed, Embase, the Cochrane

1  
2  
3  
4  
5 82 Library and Web of Science through using the combination of a series of keywords and text terms  
6  
7 83 describing OA and PEMF (Appendix 1). The latest literature search was conducted at October 13, 2017.  
8  
9 84 Studies were included if: (1) subjects with symptomatic or radiographic OA, (2) the intervention  
10  
11 85 containing PEMF versus sham-control, (3) the study was designed as a RCT, (4) the primary outcome  
12  
13 86 including pain and/or function. Studies were excluded if: (1) in vitro or animal or cadaveric studies, (2)  
14  
15 87 PEMF therapy used for post-operation rehabilitation, (3) other non-medicine therapy (e.g., short wave  
16  
17 88 or PES), (4) cannot get full-text, (5) no data available, (6) unbalanced additional non-pharmacological  
18  
19 89 treatments (e.g., exercise or hot-pack) between groups.  
20

### 21 **Quality assessment**

22  
23 92 The methodological quality of each included trial was evaluated by two independent authors based on  
24  
25 93 the Cochrane handbook,<sup>26 27</sup> which consists of seven domains: generation of randomization sequences,  
26  
27 94 allocation concealment, blinding of participants and implementers, blinding of outcome assessment,  
28  
29 95 incomplete outcome data, selective reporting and other potential bias. Furthermore, any of divergence  
30  
31 96 was to be discussed and a third consultant was needed if necessary.<sup>28 29</sup> Trials involving three or more  
32  
33 97 high risks of bias were considered as poor methodological quality.<sup>30</sup>  
34

### 35 36 **Data extraction and outcome measure**

37  
38 100 All the data extracted by two independent authors. The extracted information included the  
39  
40 101 characteristics of participants (age, gender, body mass index, and duration of OA), balance intervention  
41  
42 102 between groups, number of participants about each trial, treatment protocol of PEMF, and the type of  
43  
44 103 outcome measures, baseline data, post-treatment data and change means, and standard deviations (SD)  
45  
46 104 or the information from which SD could be derived, such as standard error (SE) or confidence interval  
47  
48 105 (CI). The primary goal of this study was to assess the efficacy of pain alleviation and function  
49  
50 106 improvement by applying the PEMF therapy for OA patients. Adverse events were considered as the  
51  
52 107 secondary outcome. The efficacy of pain alleviation was measured by change of pain intensity from  
53  
54 108 baseline.<sup>31</sup> Data from the last follow-up time point after treatment was extracted to calculate the change  
55  
56 109 degree. According to Jüni *et al.*,<sup>32 33</sup> the higher score one on hierarchy of continuous pain-related  
57  
58 110 outcomes was used if multiple pain scale measured in one study. The number of participants reported

1  
2  
3  
4  
5 111 adverse events were also extracted in order to evaluate the safety of interventions.

6  
7 112

8  
9 113 **Statistical analysis**

10 114 The Review Manager Version 5.2 was used to perform all the statistical analyses. For the reason that  
11 115 outcome of pain and function reported by continuous data and various scales were used for outcome  
12 116 assessment, the standardized mean differences (SMDs) were calculated to compare the effect of pain  
13 117 alleviation and function improvement between different intervention groups. For the safety outcome,  
14 118 the relative risk (RR) was calculated to compare the safety between two groups. Trials reported zero  
15 119 adverse event in both the PEMF and the sham groups were not included in the adverse events  
16 120 analysis.<sup>26</sup> 95% CI was calculated for pooled estimates for each outcome. Statistical significance was  
17 121 considered at  $P < 0.05$ . A random model was applied to pool the data. Q and  $I^2$  statistics were  
18 122 calculated to assess the heterogeneity among the included studies, with a p value  $> 0.05$  of the Q  
19 123 statistics and  $I^2$  value  $< 50\%$  indicating statistical homogeneity. Different exposure duration of PEMF,  
20 124 disease location was hypothesized to influence treatment effect. Therefore, subgroup analyses were  
21 125 performed according to the exposure duration of PEMF therapy (no more than 30 minutes per session  
22 126 or more than 30 minutes per session)<sup>5-7</sup> and location of OA. Funnel plots were inspected to assess  
23 127 publication bias.

24 128

25 129 **Patient and public involvement**

26 130 No patients or members of public were involved in the present study. No patients were asked to advise  
27 131 on interpretation or writing up of results. The results of present research will be communicated to the  
28 132 relevant patient community.

29 133

30 134 **RESULTS**

31 135 **Study screening and characteristics of included studies**

32 136 Figure 1 showed the flow diagram for studies screening. 192 records were identified initially and  
33 137 twelve studies<sup>9-20</sup> met the eligibility criteria and were included in this meta-analysis. The characteristics  
34 138 of included studies were summarized in Table 1. The risk of bias assessment (Figure 2) showed that  
35 139 one study<sup>9</sup> was regarded as low quality.



140

**141 Pain relief**

142 Twelve RCTs were included for meta-analysis of pain management.<sup>9-20</sup> As shown in Figure 3, PEMF  
143 group achieved a significant difference in pain improvement compared with sham group (SMD = -0.94,  
144 95% CI: -1.49, -0.39,  $P = 0.0008$ ), while significant heterogeneity was observed ( $I^2 = 92%$ ;  $P <$   
145  $0.00001$ ). Subgroup analysis showed that significant differences were observed between the PEMF and  
146 sham group on pain improvement in knee OA (SMD = -0.54, 95% CI: -1.04, -0.04,  $P = 0.03$ ) and hand  
147 OA patients (SMD = -2.85, 95% CI: -3.65, -2.04,  $P < 0.00001$ ), whereas no significant difference was  
148 achieved between groups in cervical OA patients (SMD = -2.33, 95% CI: -6.26, 1.61,  $P = 0.25$ ). As for  
149 subgroup analysis of different exposure duration, significant difference was observed when exposure  
150 duration within 30 minutes (SMD = -1.01, 95%CI: -1.64, -0.39,  $P = 0.001$ ), and no significant  
151 difference was achieved between intervention groups when exposure duration more than 30 minutes  
152 (SMD = -0.61, 95%CI: -2.25, 1.02,  $P = 0.46$ ) (see Table 2). Besides, substantial asymmetry was not  
153 identified in the funnel plot.

154

**155 Function improvement**

156 Eight RCTs were included for meta-analysis of physical function improvement.<sup>9 10 12 13 15 16 19 20</sup> Figure 4  
157 illustrated the beneficial effect of PEMF on physical function improvement (SMD = -0.45, 95% CI:  
158 -0.71, -0.19,  $P = 0.0005$ ), and substantial heterogeneity was observed ( $I^2 = 54%$ ;  $P = 0.03$ ). However,  
159 the subgroup analysis of different OA locations suggested significant differences both in knee OA and  
160 hand OA (SMD = -0.34, 95%CI: -0.53, -0.14,  $P = 0.0006$ , and SMD = -1.49, 95%CI: -2.12, -0.86,  $P <$   
161  $0.00001$ , respectively, see in Table 2), whereas there was no significant difference between groups in  
162 cervical OA patients (SMD = -0.27, 95% CI: -0.71, 0.16,  $P = 0.22$ ). In addition, there was a significant  
163 difference on effect of function improvement when exposure duration within 30 minutes (SMD = -0.50,  
164 95%CI: -0.81, -0.18,  $P = 0.002$ ), and no significant difference was observed in more than 30 minutes  
165 group (SMD = -0.33, 95%CI: -0.82, 0.17,  $P = 0.20$ ). Funnel plot also did not identify substantial  
166 asymmetry.

167

**168 Adverse events**

7

1  
2  
3  
4  
5 169 There were ten RCTs that reported adverse events.<sup>9-11 13 14 16-20</sup> Seven of them claimed that no adverse  
6  
7 170 events were observed both in PEMF and sham group.<sup>9 10 13 14 17 18 20</sup> Three trials reported the adverse  
8  
9 171 events of each treatment group, such as hip pain, spine pain, increased knee pain, vomiting, warming  
10  
11 172 sensation, increased blood pressure, numbness of feet, paraesthesia of foot and et al, and there was no  
12  
13 173 AE related drop outs in each trial.<sup>11 16 19</sup> There was no significant difference between the PEMF and the  
14  
15 174 sham group regarding adverse events (RR = 0.83, 95%CI: 0.26, 2.64,  $P = 0.75$ ) (Figure 5). Substantial  
16  
17 175 asymmetry was not identified in the funnel plot.  
18  
19 176

## 177 **DISCUSSION**

20  
21 178 This study provided a comprehensive assessment on the efficacy and safety of the PEMF therapy in  
22  
23 179 patients with knee, hand and cervical OA. The results showed that, in comparison with the  
24  
25 180 sham-control group, PEMF was more effective in both pain relief and function improvement for  
26  
27 181 patients with knee OA and hand OA, but not for patients with cervical OA. In addition, PEMF did not  
28  
29 182 lead to specific adverse events compared with the sham control group. Interestingly, a short duration of  
30  
31 183 PEMF treatment for  $\leq 30$  minutes per session seems to achieve more favorable results. This finding  
32  
33 184 may have significant implications for the clinical application of PEMF in the OA field.

34  
35 185 Some previous systematic reviews have combined PEMF and other physical therapies together to  
36  
37 186 examine their efficacy in OA patients, which might bias the results. McCarthy *et al.*<sup>34</sup> demonstrated that  
38  
39 187 PEMF and short-wave together had limited effect in treating knee OA. In contrast, We *et al.*<sup>35</sup> reported  
40  
41 188 different results. Based on the follow-up data extracted from different time points for subgroup analysis,  
42  
43 189 they concluded that the combination of PEMF and short-wave was more effective in functional  
44  
45 190 improvement, but not in pain relief, at 8 weeks after the first treatment.<sup>35</sup> It should be noted that<sup>36</sup>  
46  
47 191 short-wave therapy was considered to be another type of physical therapy which was different from  
48  
49 192 PEMF.<sup>36</sup> Similarly, another study conducted by Li *et al.*<sup>24</sup> reported that PEMF and PES might provide  
50  
51 193 moderate benefit for OA sufferers in terms of pain relief. However, considering that PES relies on the  
52  
53 194 direct application of an electrical field and PEMF creates induced current through magnetic impulse,  
54  
55 195 the combined analysis of these two physical therapies may also bias the results.

56  
57 196 The results of the present study showed that PEMF had significant effects in pain alleviation and  
58  
59 197 function improvement comparing with the sham-control group in knee and hand OA patients, but not in

1  
2  
3  
4 198 cervical OA patients. The poor efficacy of the treatment for cervical OA may due to the anatomical  
5  
6 199 factors of cervical spine. The neurovascular structures contained in the cervical spinal canal may be  
7  
8 200 compressed due to cervical OA, which will then induce a series of symptoms, such as the upper limb  
9  
10 201 nerve root pain induced by nerve root compression; the chronic vertebral and basilar arterial  
11  
12 202 insufficiency due to compression of vertebral arteries; the numbness of limbs and easiness to falling  
13  
14 203 caused by spinal cord compression.<sup>37 38</sup> Although some studies showed that PEMF could enhance  
15  
16 204 articular cartilage regeneration,<sup>39 40</sup> no evidence yet demonstrated that PEMF can reduce osteophytes  
17  
18 205 formation, which may induce nerve root compression then lead to deterioration of pain and function.

19 206 The present study further examined the association between the exposure duration of PEMF and  
20  
21 207 efficacy for patients with OA. The results suggested that the exposure duration  $\leq 30$  minutes per  
22  
23 208 session could achieved better efficacy both in pain relief and function improvement. The reason could  
24  
25 209 be explained by several previous laboratory studies. A recent study exploring the effects of different  
26  
27 210 PEMF treatment durations (ranged from 5 to 60 minutes) over the mesenchymal stem cells (MSC)  
28  
29 211 chondrogenic differentiation reported that the expression of MSC chondrogenic markers showed the  
30  
31 212 greatest increase in response to 5-20 minutes PEMF treatment.<sup>41</sup> Similarly, another two studies which  
32  
33 213 have shown that PEMF could activate cellular signaling transduction rapidly within 5-10 minutes,  
34  
35 214 whereas the signaling might be largely benumbed after 30 minutes.<sup>5-7</sup>

36 215 Nevertheless, limitations of the present study should be acknowledged. Firstly, since different  
37  
38 216 treatment protocols of PEMF were used in the included studies, there was a high level of heterogeneity  
39  
40 217 among various studies. Secondly, there were sparse eligible trials available for the efficacy analysis of  
41  
42 218 hand OA and cervical OA, and the reliability of the conclusions on these two joints were limited.  
43  
44 219 Finally, morphological change is a meaningful outcome for exploring the treatment efficacy of PEMF  
45  
46 220 further;<sup>19</sup> however, the morphological changes were not reported in the present study due to the lack of  
47  
48 221 relevant data. More trials are needed to evaluate the morphological changes after PEMF therapy.

49 222

## 50 223 **CONCLUSION**

51 224 The present study revealed that PEMF could alleviate pain and improve physical function for knee and  
52  
53 225 hand OA patients, but not for cervical OA. Meanwhile, a short PEMF treatment duration (within 30  
54  
55 226 minutes) may achieve more favorable efficacy.

1  
2  
3  
4  
5  
6  
7  
8  
9  
10  
11  
12  
13  
14  
15  
16  
17  
18  
19  
20  
21  
22  
23  
24  
25  
26  
27  
28  
29  
30  
31  
32  
33  
34  
35  
36  
37  
38  
39  
40  
41  
42  
43  
44  
45  
46  
47  
48  
49  
50  
51  
52  
53  
54  
55  
56  
57  
58  
59  
60

227 **Author contributions**

228 ZYW, DXX, XD and YLW were responsible for conception and design of the study. ZYW, XD, DXX,  
229 and YLW contributed to study retrieval. YC and YLX contributed to quality assessment. HL, TY and  
230 JTL contributed to data collection. JW and CZ contributed to statistical analysis. ZYW, XD, DXX and  
231 YLW drafted the manuscript. CZ and GHJ contributed to revision of the manuscript. All authors read  
232 and approved the final manuscript.

233 **Declaration of funding**

234 This work was supported by the National Natural Science Foundation of China (81472130, 81672225,  
235 81601941, 81501923, 81772413, 81702207, 81702206), the Postdoctoral Science Foundation of  
236 Central South University (182130), the Young Investigator Grant of Xiangya Hospital, Central South  
237 University (2016Q03, 2016Q06), the Scientific Research Project of the Development and Reform  
238 Commission of Hunan Province ([2013]1199), the Scientific Research Project of Science and  
239 Technology Office of Hunan Province (2013SK2018), the Key Research and Development Program of  
240 Hunan Province (2016JC2038), the Xiangya Clinical Big Data System Construction Project of Central  
241 South University (45), the Clinical Scientific Research Foundation of Xiangya Hospital, Central South  
242 University (2015L03) and the Natural Science Foundation of Hunan Province (2017JJ3491,  
243 2017JJ3492).

244 **Declaration of financial/other relationships**

245 None of the authors has any financial and personal relationships with other people or organizations that  
246 could potentially and inappropriately influence this work and its conclusions.

247 **Competing Interests statement:** All authors declare that they have no conflict of interest.

248 **REFERENCES:**

- 249 1. Felson DT, Lawrence RC, Dieppe PA, et al. Osteoarthritis: new insights. Part 1: the disease and its  
250 risk factors. *Ann Intern Med* 2000;133(8):635-46.
- 251 2. Jordan KM, Arden NK, Doherty M, et al. EULAR Recommendations 2003: an evidence based  
252 approach to the management of knee osteoarthritis: Report of a Task Force of the Standing  
253 Committee for International Clinical Studies Including Therapeutic Trials (ESCISIT). *Ann Rheum*  
254 *Dis* 2003;62(12):1145-55.
- 255 3. McAlindon TE, Bannuru RR, Sullivan MC, et al. OARSI guidelines for the non-surgical  
256 management of knee osteoarthritis. *Osteoarthritis Cartilage* 2014;22(3):363-88.
- 257 4. Raji AR, Bowden RE. Effects of high peak pulsed electromagnetic fields on degeneration and  
258 regeneration of the common peroneal nerve in rat. *Lancet* 1982;2(8295):444-5.
- 259 5. Uckun FM, Kurosaki T, Jin J, et al. Exposure of B-lineage lymphoid cells to low energy  
260 electromagnetic fields stimulates Lyn kinase. *J Biol Chem* 1995;270(46):27666-70.
- 261 6. Dibirdik I, Kristupaitis D, Kurosaki T, et al. Stimulation of Src family protein-tyrosine kinases as a  
262 proximal and mandatory step for SYK kinase-dependent phospholipase Cgamma2 activation in  
263 lymphoma B cells exposed to low energy electromagnetic fields. *J Biol Chem* 1998;273(7):4035-9.
- 264 7. Kristupaitis D, Dibirdik I, Vassilev A, et al. Electromagnetic field-induced stimulation of Bruton's  
265 tyrosine kinase. *J Biol Chem* 1998;273(20):12397-401.
- 266 8. De Mattei M, Caruso A, Pezzetti F, et al. Effects of pulsed electromagnetic fields on human  
267 articular chondrocyte proliferation. *Connective Tissue Res* 2001;42(4):269-79.
- 268 9. Ay S, Evcik D. The effects of pulsed electromagnetic fields in the treatment of knee osteoarthritis:  
269 a randomized, placebo-controlled trial. *Rheumatol Int* 2009;29(6):663-6.
- 270 10. Bagnato GL, Miceli G, Marino N, et al. Pulsed electromagnetic fields in knee osteoarthritis: a  
271 double blind, placebo-controlled, randomized clinical trial. *Rheumatology* 2016;55(4):755-62.
- 272 11. Fischer G, Pelka R, Barovic J. Adjuvante Behandlung der Gonarthrose mit schwachen pulsierenden  
273 Magnetfeldern. *Aktuelle Rheumatologie* 2006;31(4):226-33.
- 274 12. Kanat E, Alp A, Yurtkuran M. Magnetotherapy in hand osteoarthritis: A pilot trial. *Complement*  
275 *Ther Med* 2013;21(6):603-8.
- 276 13. Lee J, Park J, Sheen D, et al. The Effect of Pulsed Electromagnetic Fields in the Treatment of Knee  
277 Osteoarthritis. Report of Double-blind, Placebo-controlled, Randomized Trial. *J Korean Rheum*  
278 *Assoc* 2004;11(2):143-50.
- 279 14. Nelson FR, Zvirbulis R, Pilla AA. Non-invasive electromagnetic field therapy produces rapid and  
280 substantial pain reduction in early knee osteoarthritis: a randomized double-blind pilot study.  
281 *Rheumatol Int* 2013;33(8):2169-73.
- 282 15. Nicolakis P, Kollmitzer J, Crevenna R, et al. Pulsed magnetic field therapy for osteoarthritis of the  
283 knee--a double-blind sham-controlled trial. *Wien Klin Wochenschr* 2002;114(15-16):678-84.
- 284 16. Pipitone N, Scott DL. Magnetic Pulse Treatment for Knee Osteoarthritis: A Randomised,  
285 Double-Blind, Placebo-Controlled Study. *Curr Med Res Opin* 2001;17:190-6.
- 286 17. Sutbeyaz ST, Sezer N, Koseoglu BF. The effect of pulsed electromagnetic fields in the treatment of  
287 cervical osteoarthritis: a randomized, double-blind, sham-controlled trial. *Rheumatol Int*  
288 2006;26(4):320-4.
- 289 18. Tejero Sánchez M, Muniesa PM, Díaz SP, et al. Effects of magnetotherapy in knee pain secondary

- 1  
2  
3  
4 290 to knee osteoarthritis. A prospective double-blind study. *Patología Del Aparato Locomotor*  
5 291 2003;1(3):190-5.
- 6  
7 292 19. Thamsborg G, Florescu A, Oturai P, et al. Treatment of knee osteoarthritis with pulsed  
8 293 electromagnetic fields: a randomized, double-blind, placebo-controlled study. *Osteoarthritis*  
9 294 *Cartilage* 2005;13(7):575-81.
- 10  
11 295 20. Trock DH, Bollet AJ, Markoll R. The effect of pulsed electromagnetic fields in the treatment of  
12 296 osteoarthritis of the knee and cervical spine. Report of randomized, double blind, placebo controlled  
13 297 trials. *J Rheumatol* 1994;21(10):1903-11.
- 14  
15 298 21. Dundar U, Asik G, Ulasli AM, et al. Assessment of pulsed electromagnetic field therapy with  
16 299 Serum YKL-40 and ultrasonography in patients with knee osteoarthritis. *Int J Rheum Dis*  
17 300 2016;19(3):287-93.
- 18  
19 301 22. Özgüçlü E, Çetin A, Çetin M, et al. Additional effect of pulsed electromagnetic field therapy on  
20 302 knee osteoarthritis treatment: a randomized, placebo-controlled study. *Clin Rheumatol*  
21 303 2010;29(8):927-31.
- 22  
23 304 23. Negm A, Lorbergs A, Macintyre NJ. Efficacy of low frequency pulsed subsensory threshold  
24 305 electrical stimulation vs placebo on pain and physical function in people with knee osteoarthritis:  
25 306 systematic review with meta-analysis. *Osteoarthritis Cartilage* 2013;21(9):1281-9.
- 26  
27 307 24. Li SS, Yu B, Zhou D, et al. Electromagnetic fields for treating osteoarthritis. *Cochrane DB Syst Rev*  
28 308 2013;Issue 12. Art. No.: CD003523.
- 29  
30 309 25. Fary RE, Carroll GJ, Briffa TG, et al. The effectiveness of pulsed electrical stimulation in the  
31 310 management of osteoarthritis of the knee: results of a double-blind, randomized, placebo-controlled,  
32 311 repeated-measures trial. *Arthritis Rheum* 2011;63(5):1333-42.
- 33  
34 312 26. Higgins JPT, Green S, Browne KD. *Cochrane Handbook for Systematic Reviews of Interventions:*  
35 313 *A Handbook*. Hoboken: John Wiley & Sons, Incorporated, 2010:439.
- 36  
37 314 27. Zeng C, Li YS, Wei J, et al. Analgesic effect and safety of single-dose intra-articular magnesium  
38 315 after arthroscopic surgery: a systematic review and meta-analysis. *Sci Rep* 2016;6:38024.
- 39  
40 316 28. Xie DX, Zeng C, Wang YL, et al. A Single-Dose Intra-Articular Morphine plus Bupivacaine versus  
41 317 Morphine Alone following Knee Arthroscopy: A Systematic Review and Meta-Analysis. *PLoS One*  
42 318 2015;10(10):e140512.
- 43  
44 319 29. Cui Y, Yang T, Zeng C, et al. Intra-articular bupivacaine after joint arthroplasty: a systematic  
45 320 review and meta-analysis of randomised placebo-controlled studies. *BMJ Open* 2016;6(7):e11325.
- 46  
47 321 30. Zeng C, Wei J, Li H, et al. Effectiveness and safety of Glucosamine, chondroitin, the two in  
48 322 combination, or celecoxib in the treatment of osteoarthritis of the knee. *Sci Rep* 2015;5:16827.
- 49  
50 323 31. Zeng C, Li H, Yang T, et al. Electrical stimulation for pain relief in knee osteoarthritis: systematic  
51 324 review and network meta-analysis. *Osteoarthritis Cartilage* 2015;23(2):189-202.
- 52  
53 325 32. Jüni P, Reichenbach S, Dieppe P. Osteoarthritis: rational approach to treating the individual. *Best*  
54 326 *Practice & Research Clinical Rheumatology* 2006;20(4):721-40.
- 55  
56 327 33. Reichenbach S, Sterchi R, Scherer M, et al. Meta-analysis: Chondroitin for Osteoarthritis of the  
57 328 Knee or Hip. *Ann Intern Med* 2007;146(8):580.
- 58  
59 329 34. McCarthy CJ, Callaghan MJ, Oldham JA. Pulsed electromagnetic energy treatment offers no  
60 330 clinical benefit in reducing the pain of knee osteoarthritis: a systematic review. *BMC Musculoskelet*  
331 *Disord* 2006;7:51.
- 332 35. Ryang WS, Koog YH, Jeong KI, et al. Effects of pulsed electromagnetic field on knee osteoarthritis:

- 1  
2  
3  
4 333 a systematic review. *Rheumatology (Oxford)* 2013;52(5):815-24.  
5  
6 334 36. Shamliyan TA, Wang SY, Olson-Kellogg B, et al. *Physical Therapy Interventions for Knee Pain*  
7 335 *Secondary to Osteoarthritis*. Rockville (MD): Agency for Healthcare Research and Quality (US),  
8 336 2012.  
9 337 37. Valat JP, Lioret E. Cervical spine osteoarthritis. *La Revue Du Praticien* 1996;46(18):2206.  
10 338 38. Wilder FV, Fahlman L, Donnelly R. Radiographic cervical spine osteoarthritis progression rates: a  
11 339 longitudinal assessment. *Rheumatol Int* 2011;31(1):45-8.  
12 340 39. Ciombor DM, Aaron RK, Wang S, et al. Modification of osteoarthritis by pulsed electromagnetic  
13 341 field - A morphological study. *Osteoarthritis Cartilage* 2003;11(6):455-62.  
14 342 40. Chang CH, Loo ST, Liu HL, et al. Can low frequency electromagnetic field help cartilage tissue  
15 343 engineering? *J Biomed Mater Res a* 2010;92(3):843-51.  
16 344 41. Parate D, Franco-Obregon A, Frohlich J, et al. Enhancement of mesenchymal stem cell  
17 345 chondrogenesis with short-term low intensity pulsed electromagnetic fields. *Sci Rep*  
18 346 2017;7(1):9421.  
19 347  
20  
21  
22  
23  
24  
25  
26  
27  
28  
29  
30  
31  
32  
33  
34  
35  
36  
37  
38  
39  
40  
41  
42  
43  
44  
45  
46  
47  
48  
49  
50  
51  
52  
53  
54  
55  
56  
57  
58  
59  
60

Table 1. Characteristics of included studies

| Studies         | Balance | N                        | Location of OA | Age, years (mean ± SD) | Female %       | Mean BMI, kg/m <sup>2</sup> (mean ± SD) | Duration of OA, years (mean ± SD) | Exposure of intervention |                              | Time point for outcome measure |                                                      |
|-----------------|---------|--------------------------|----------------|------------------------|----------------|-----------------------------------------|-----------------------------------|--------------------------|------------------------------|--------------------------------|------------------------------------------------------|
|                 |         |                          |                |                        |                |                                         |                                   | Daily time               | Exposure duration            |                                |                                                      |
| Ay 2009         | PEMF    | Hot pack, TENS           | 55             | Knee                   | 58.9 ± 8.8     | 70.0                                    | NA                                | 3.6 ± 4.6                | 30 minutes                   | 3 weeks (15 sessions)          | After treatment                                      |
|                 | Placebo |                          |                |                        | 57.7 ± 6.5     | 76.0                                    | NA                                | 3.5 ± 4.1                |                              |                                |                                                      |
| Bagnato 2016    | PEMF    | None                     | 60             | Knee                   | 67.7 ± 10.9    | 70.0                                    | 27.4 ± 4.3                        | 12.1 ± 8.2               | A minimum of 12 hours        | 1 month (30 sessions)          | 1 month                                              |
|                 | Placebo |                          |                |                        | 68.6 ± 11.9    | 73.3                                    | 27.7 ± 4.6                        | 12.4 ± 9.1               |                              |                                |                                                      |
| Fischer 2006    | PEMF    | None                     | 71             | Knee                   | 52.1 ± 1.9     | 71.4                                    | 29.2 ± 1.0                        | 6.8 ± 0.7                | 16 minutes                   | 6 weeks (42 sessions)          | Therapy-End, 4weeks after therapy-End                |
|                 | Placebo |                          |                |                        | 62.1 ± 1.5     | 72.2                                    | 29.4 ± 0.7                        | 6.2 ± 0.6                |                              |                                |                                                      |
| Lee 2004        | PEMF    | None                     | 51             | Knee                   | 63.5 ± 8.9     | 8.0                                     | 26.1 ± 3.1                        | 12.7 ± 7.5               | 30 minutes                   | 6weeks (18 sessions)           | 3, 6 weeks during treatment, 4 weeks after finishing |
|                 | Placebo |                          |                |                        | 66.2 ± 8.8     | 11.5                                    | 27.1 ± 3.7                        | 12.8 ± 7.6               |                              |                                |                                                      |
| Nelson 2013     | PEMF    | Current standard of care | 34             | Knee                   | 55.5 ± 2.5     | 73.7                                    | 33.5 ± 1.9                        | NA                       | 15 minutes                   | 6 weeks (84 sessions)          | 14, 29, 42 days                                      |
|                 | Placebo |                          |                |                        | 58.4 ± 2.5     | 66.7                                    | 34.7 ± 1.7                        | NA                       |                              |                                |                                                      |
| Nicolakis 2002  | PEMF    | None                     | 36             | Knee                   | 69.0 ± 5.0     | 73.3                                    | NA                                | NA                       | 30 minutes                   | 6 weeks (84 sessions)          | After treatment                                      |
|                 | Placebo |                          |                |                        | 67.0 ± 7.0     | 47.1                                    | NA                                | NA                       |                              |                                |                                                      |
| Pipitone (2001) | PEMF    | None                     | 75             | Knee                   | 62.0 (40–84) * | 35.3                                    | NA                                | 4.0 (1.0–18.0) *         | 10 minutes and 3 times a day | 6 weeks                        | 2, 4, 6 weeks after study entry                      |
|                 | Placebo |                          |                |                        | 64.0 (48–84) * | 20.0                                    | NA                                | 8.0 (0.5–31.0) *         |                              |                                |                                                      |



|                     |                 |                                      |    |          |                            |              |                          |                          |            |                         |                                                            |
|---------------------|-----------------|--------------------------------------|----|----------|----------------------------|--------------|--------------------------|--------------------------|------------|-------------------------|------------------------------------------------------------|
| Tejero Sánchez 2003 | PEMF<br>Placebo | None                                 | 83 | Knee     | 67.4 ± 8.7<br>68.0 ± 8.3   | 87.9<br>88.2 | NA<br>NA                 | NA<br>NA                 | 30 minutes | 20 sessions             | The end of therapy, one month after therapy                |
| Thamsborg 2005      | PEMF<br>Placebo | None                                 | 83 | Knee     | 60.4 ± 8.7<br>59.6 ± 8.6   | 46.5<br>61.0 | 27.0 ± 4.0<br>27.5 ± 5.7 | 7.5 ± 5.2<br>7.9 ± 7.7   | 2 hours    | 6 weeks (30 sessions)   | 2 weeks, end of treatment, 6 weeks after end of treatment  |
| Trock 1994 §        | PEMF<br>Placebo | Do not change basic therapeutic      | 86 | Knee     | 69.2 ± 11.5<br>65.8 ± 11.7 | 69.0<br>70.5 | NA<br>NA                 | 9.1 ± 8.9<br>7.4 ± 7.2   | 30 minutes | 4-5 weeks (18 sessions) | Midway of therapy, the last treatment, and one month later |
| Sutbeyaz 2006       | PEMF<br>Placebo | None                                 | 34 | Cervical | 43.2 ± 10.3<br>42.1 ± 10.1 | 64.7<br>66.7 | NA<br>NA                 | NA<br>NA                 | 30 minutes | 3 weeks (42 sessions)   | After treatment                                            |
| Trock 1994 §        | PEMF<br>Placebo | Do not change basic therapeutic      | 81 | Cervical | 61.2 ± 13.4<br>67.4 ± 8.0  | 28.6<br>30.8 | NA<br>NA                 | 7.4 ± 6.7<br>8.1 ± 8.0   | 30 minutes | 4-5 weeks (18 sessions) | Midway of therapy, the last treatment, and one month later |
| Kanat 2013          | PEMF<br>Placebo | Active range of motion and resistive | 50 | Hand     | 64.0 ± 2.60<br>62.0 ± 2.40 | NA<br>NA     | NA<br>NA                 | 5.01 ± 2.3<br>4.31 ± 4.7 | 20 minutes | 10 days                 | After treatment                                            |

N, number of participates; BMI, body mass index; OA, osteoarthritis; PEMF, pulsed electromagnetic field; NA, not available; TENS, transcutaneous electrical nerve stimulation.

\* Age and duration of OA in this trial were expressed by median (range).

§ This trial provided data of knee OA and cervical OA patients respectively.

Table 2. Results of subgroup analyses.

| Reason for subgroup analyses | Pooled Results of Subgroups |        | Heterogeneity of Subgroups |         |           |
|------------------------------|-----------------------------|--------|----------------------------|---------|-----------|
|                              | SMD/RR                      | 95% CI | I <sup>2</sup> (%)         | p Value |           |
| <b>Pain</b>                  |                             |        |                            |         |           |
| Location                     | Knee OA                     | -0.54  | [-1.04, 0.04]              | 88      | 0.03      |
|                              | Cervical OA                 | -2.33  | [-6.26, 1.61]              | 97      | 0.25      |
|                              | Hand OA                     | -2.85  | [-3.65, -2.04]             | NA      | < 0.00001 |
| Exposure duration            | No more than 0.5hr/session  | -1.01  | [-1.64, -0.39]             | 91      | 0.001     |
|                              | More than 0.5hr/session     | -0.61  | [-2.25, 1.02]              | 95      | 0.46      |
| <b>Function</b>              |                             |        |                            |         |           |
| Location                     | Knee OA                     | -0.34  | [-0.53, -0.14]             | 0       | 0.0006    |
|                              | Cervical OA                 | -0.27  | [-0.71, 0.16]              | NA      | 0.22      |
|                              | Hand OA                     | -1.49  | [-2.12, -0.86]             | NA      | < 0.00001 |
| Exposure duration            | No more than 0.5hr/session  | -0.50  | [-0.81, -0.18]             | 59      | 0.002     |
|                              | More than 0.5hr/session     | -0.33  | [-0.82, 0.17]              | 54      | 0.20      |
| <b>Adverse event</b>         |                             |        |                            |         |           |
| Exposure duration            | No more than 0.5hr/session  | 0.42   | [0.14, 1.29]               | 0       | 0.13      |
|                              | More than 0.5hr/session     | 1.95   | [0.81, 4.71]               | NA      | 0.14      |

OA, osteoarthritis; SMD, standard mean difference; RR, relative risk; CI, confidence interval; NA, not available.

1  
2  
3  
4  
5  
6  
7  
8  
9  
10  
11  
12  
13  
14  
15  
16  
17  
18  
19  
20  
21  
22  
23  
24  
25  
26  
27  
28  
29  
30  
31  
32  
33  
34  
35  
36  
37  
38  
39  
40  
41  
42  
43  
44  
45  
46  
47  
48  
49  
50  
51  
52  
53  
54  
55  
56  
57  
58  
59  
60

Figure 1. Flowchart of studies screening process based on the PRISMA guideline.

OA: osteoarthritis, PEMF: pulsed electromagnetic field

Figure 2. Risk of bias summary of twelve included studies.

Figure 3. Forest plot of PEMF compared to sham-control on pain.

PEMF: pulsed electromagnetic field

Figure 4. Forest plot of PEMF compared to sham-control on function.

PEMF: pulsed electromagnetic field

Figure 5. Forest plot of PEMF compared to sham-control on adverse events.

PEMF: pulsed electromagnetic field

For peer review only

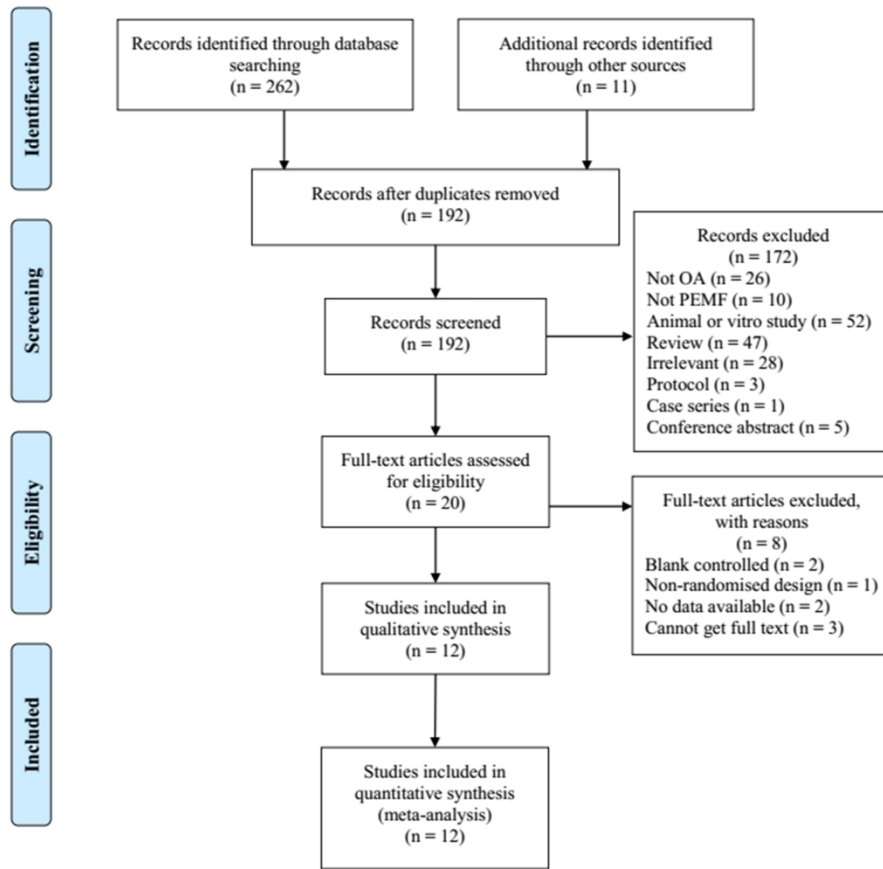

Figure 1. Flowchart of studies screening process based on the PRISMA guideline.  
OA: osteoarthritis; PEMF: pulsed electromagnetic field

173x155mm (300 x 300 DPI)



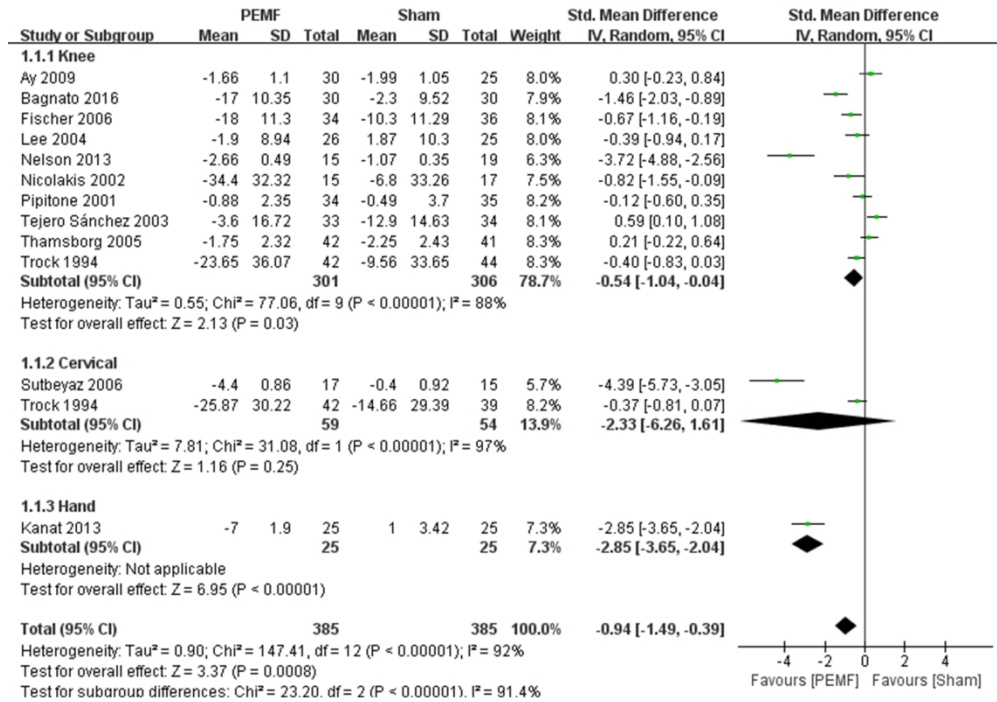

Figure 3. Forest plot of PEMF compared to sham-control on pain.  
PEMF: pulsed electromagnetic field

173x123mm (300 x 300 DPI)

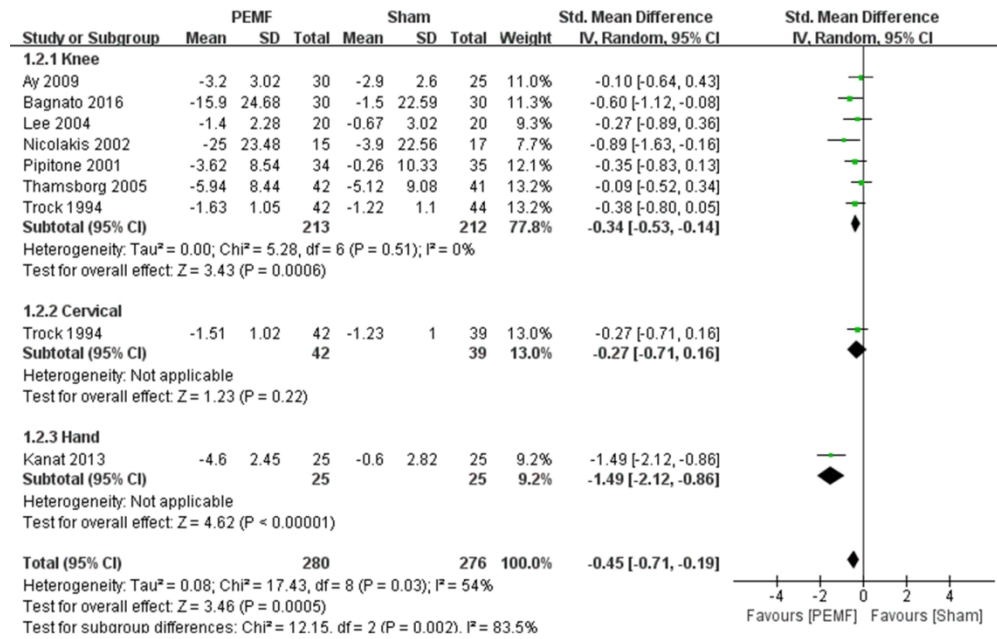

Figure 4. Forest plot of PEMF compared to sham-control on function.  
PEMF: pulsed electromagnetic field

173x109mm (300 x 300 DPI)

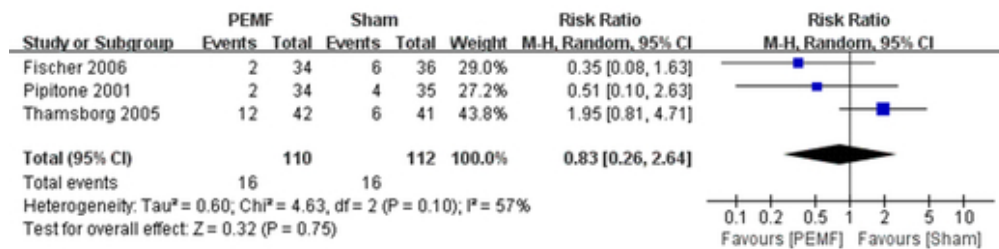

Figure 5. Forest plot of PEMF compared to sham-control on adverse events.  
 PEMF: pulsed electromagnetic field

43x11mm (300 x 300 DPI)



## Search Strategies

### PubMed search strategy

#1 Pulsed electromagnetic field[Title/Abstract]

#2 Pulsed electromagnetic fields[Title/Abstract]

#3 Pulsed electromagnetic field[mesh]

**#4 #1 or #2 or #3**

#5 Osteoarthritis[Mesh]

#6 (osteoarthro\*[tiab] or gonarthriti\*[tiab] or gonarthro\*[tiab] or coxarthriti\*[tiab] or coxarthro\*[tiab] or osteo?arthritis[tiab])

**#7 #5 or #6**

#8 randomized[tiab]

#9 placebo[tiab]

#10 controlled[tiab]

#11 random\*[tiab]

#12 trial\*[tiab]

#13 groups[tiab]

#14 ((singl\*[tiab] or doubl\*[tiab] or tripl\*[tiab]) and (mask\*[tiab] or blind\*[tiab]))

**#15 #8 or #9 or #10 or #11 or #12 or #13 or #14**

**#16 #4 and #7 and #15**

### Embase search strategy

#1 'Pulsed electromagnetic field'/exp

#2 Pulsed electromagnetic fields:ti,ab

#3 Pulsed electromagnetic field: ti,ab

**#4 #1 or #2 or #3**

#5 osteoarthro\* or gonarthriti\* or gonarthro\* or coxarthriti\* or coxarthro\* or osteoarthritis:ti,ab

#6 'Osteoarthritis'/exp

**#7 #5 or #6**

#8 random\* or control\* or trial\* or placebo:ti,ab

#9 groups:ti,ab

#10 (singl\* or doubl\* or tripl\*) and (mask\* or blind\*):ti,ab

**#11 #8 or #9 or #10**

**#12 #4 and #7 and #11**

### Cochrane Library search strategy

#1 MeSH descriptor Pulsed electromagnetic field explode all trees

#2 Pulsed electromagnetic field:ti,ab,kw

**#3 #1 or #2**

#4 MeSH descriptor osteoarthritis explode all trees

#5 osteoarthro\* or gonarthriti\* or gonarthro\* or coxarthriti\* or coxarthro\* or osteo?arthritis:ti,ab,kw

**#6 #4 or #5**

#7 random\* or control\* or trial\* or placebo:ti,ab,kw

#8 Groups:ti,ab,kw

1  
2  
3 #9 (singl\* or doubl\* or tripl\*) and (mask\* or blind\*):ti,ab,kw

4 #10 #7 or #8 or #9

5  
6 #11 #3 and #6 and #10

7  
8 **Web of Science search strategy**

9 #1 Topic:(Pulsed electromagnetic field)

10 #2 Topic:(Pulsed electromagnetic fields)

11 #3 #1 or #2

12 #4 Topic:(Osteoarthritis)

13 #5 Topic:(osteoarthro\* or gonarthriti\* or gonarthro\* or coxarthriti\* or coxarthro\* or osteo?arthritis)

14 #6 #4 or #5

15 #7 Topic:(randomized or placebo or controlled or random\* or trial\* or groups)

16 #8 Topic:((singl\* or doubl\* or tripl\*) and (mask\* or blind\*))

17 #9 #7 or #8

18 #10 #3 and #6 and #9

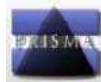

# PRISMA 2009 Checklist

| Section/topic                      | #  | Checklist item                                                                                                                                                                                                                                                                                              | Reported on page #    |
|------------------------------------|----|-------------------------------------------------------------------------------------------------------------------------------------------------------------------------------------------------------------------------------------------------------------------------------------------------------------|-----------------------|
| <b>TITLE</b>                       |    |                                                                                                                                                                                                                                                                                                             |                       |
| Title                              | 1  | Identify the report as a systematic review, meta-analysis, or both.                                                                                                                                                                                                                                         | 1                     |
| <b>ABSTRACT</b>                    |    |                                                                                                                                                                                                                                                                                                             |                       |
| Structured summary                 | 2  | Provide a structured summary including, as applicable: background; objectives; data sources; study eligibility criteria, participants, and interventions; study appraisal and synthesis methods; results; limitations; conclusions and implications of key findings; systematic review registration number. | 2                     |
| <b>INTRODUCTION</b>                |    |                                                                                                                                                                                                                                                                                                             |                       |
| Rationale                          | 3  | Describe the rationale for the review in the context of what is already known.                                                                                                                                                                                                                              | 4                     |
| Objectives                         | 4  | Provide an explicit statement of questions being addressed with reference to participants, interventions, comparisons, outcomes, and study design (PICOS).                                                                                                                                                  | 4                     |
| <b>METHODS</b>                     |    |                                                                                                                                                                                                                                                                                                             |                       |
| Protocol and registration          | 5  | Indicate if a review protocol exists, if and where it can be accessed (e.g., Web address), and, if available, provide registration information including registration number.                                                                                                                               | -                     |
| Eligibility criteria               | 6  | Specify study characteristics (e.g., PICOS, length of follow-up) and report characteristics (e.g., years considered, language, publication status) used as criteria for eligibility, giving rationale.                                                                                                      | 4, 5                  |
| Information sources                | 7  | Describe all information sources (e.g., databases with dates of coverage, contact with study authors to identify additional studies) in the search and date last searched.                                                                                                                                  | 4, 5                  |
| Search                             | 8  | Present full electronic search strategy for at least one database, including any limits used, such that it could be repeated.                                                                                                                                                                               | Details in Appendix 1 |
| Study selection                    | 9  | State the process for selecting studies (i.e., screening, eligibility, included in systematic review, and, if applicable, included in the meta-analysis).                                                                                                                                                   | 5                     |
| Data collection process            | 10 | Describe method of data extraction from reports (e.g., piloted forms, independently, in duplicate) and any processes for obtaining and confirming data from investigators.                                                                                                                                  | 5                     |
| Data items                         | 11 | List and define all variables for which data were sought (e.g., PICOS, funding sources) and any assumptions and simplifications made.                                                                                                                                                                       | 5                     |
| Risk of bias in individual studies | 12 | Describe methods used for assessing risk of bias of individual studies (including specification of whether this was done at the study or outcome level), and how this information is to be used in any data synthesis.                                                                                      | 6                     |
| Summary measures                   | 13 | State the principal summary measures (e.g., risk ratio, difference in means).                                                                                                                                                                                                                               | 6                     |
| Synthesis of results               | 14 | Describe the methods of handling data and combining results of studies, if done, including measures of consistency (e.g., $I^2$ ) for each meta-analysis.                                                                                                                                                   | 6                     |

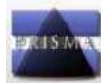

# PRISMA 2009 Checklist

| Section/topic                 | #  | Checklist item                                                                                                                                                                                           | Reported on page #     |
|-------------------------------|----|----------------------------------------------------------------------------------------------------------------------------------------------------------------------------------------------------------|------------------------|
| Risk of bias across studies   | 15 | Specify any assessment of risk of bias that may affect the cumulative evidence (e.g., publication bias, selective reporting within studies).                                                             | -                      |
| Additional analyses           | 16 | Describe methods of additional analyses (e.g., sensitivity or subgroup analyses, meta-regression), if done, indicating which were pre-specified.                                                         | 6                      |
| <b>RESULTS</b>                |    |                                                                                                                                                                                                          |                        |
| Study selection               | 17 | Give numbers of studies screened, assessed for eligibility, and included in the review, with reasons for exclusions at each stage, ideally with a flow diagram.                                          | 6, details in figure 1 |
| Study characteristics         | 18 | For each study, present characteristics for which data were extracted (e.g., study size, PICOS, follow-up period) and provide the citations.                                                             | 6, details in table 1  |
| Risk of bias within studies   | 19 | Present data on risk of bias of each study and, if available, any outcome level assessment (see item 12).                                                                                                | 6, details in figure 5 |
| Results of individual studies | 20 | For all outcomes considered (benefits or harms), present, for each study: (a) simple summary data for each intervention group (b) effect estimates and confidence intervals, ideally with a forest plot. | 6-8                    |
| Synthesis of results          | 21 | Present results of each meta-analysis done, including confidence intervals and measures of consistency.                                                                                                  | 6-8                    |
| Risk of bias across studies   | 22 | Present results of any assessment of risk of bias across studies (see Item 15).                                                                                                                          | -                      |
| Additional analysis           | 23 | Give results of additional analyses, if done (e.g., sensitivity or subgroup analyses, meta-regression [see Item 16]).                                                                                    | 6-7                    |
| <b>DISCUSSION</b>             |    |                                                                                                                                                                                                          |                        |
| Summary of evidence           | 24 | Summarize the main findings including the strength of evidence for each main outcome; consider their relevance to key groups (e.g., healthcare providers, users, and policy makers).                     | 8-9                    |
| Limitations                   | 25 | Discuss limitations at study and outcome level (e.g., risk of bias), and at review-level (e.g., incomplete retrieval of identified research, reporting bias).                                            | 9                      |
| Conclusions                   | 26 | Provide a general interpretation of the results in the context of other evidence, and implications for future research.                                                                                  | 9                      |
| <b>FUNDING</b>                |    |                                                                                                                                                                                                          |                        |
| Funding                       | 27 | Describe sources of funding for the systematic review and other support (e.g., supply of data); role of funders for the systematic review.                                                               | 10                     |

From: Moher D, Liberati A, Tetzlaff J, Altman DG, The PRISMA Group (2009). Preferred Reporting Items for Systematic Reviews and Meta-Analyses: The PRISMA Statement. PLoS Med 6(7): e1000097. doi:10.1371/journal.pmed1000097

For more information, visit: [www.prisma-statement.org](http://www.prisma-statement.org).

# BMJ Open

## Efficacy and Safety of the Pulsed Electromagnetic Field in Osteoarthritis: A Meta-analysis

|                                 |                                                                                                                                                                                                                                                                                                                                                                                                                                                                                                                                                                                                                                                                                                                                                                                                                                                                                                                                                                                                                                                                                                                                                                             |
|---------------------------------|-----------------------------------------------------------------------------------------------------------------------------------------------------------------------------------------------------------------------------------------------------------------------------------------------------------------------------------------------------------------------------------------------------------------------------------------------------------------------------------------------------------------------------------------------------------------------------------------------------------------------------------------------------------------------------------------------------------------------------------------------------------------------------------------------------------------------------------------------------------------------------------------------------------------------------------------------------------------------------------------------------------------------------------------------------------------------------------------------------------------------------------------------------------------------------|
| Journal:                        | <i>BMJ Open</i>                                                                                                                                                                                                                                                                                                                                                                                                                                                                                                                                                                                                                                                                                                                                                                                                                                                                                                                                                                                                                                                                                                                                                             |
| Manuscript ID                   | bmjopen-2018-022879.R1                                                                                                                                                                                                                                                                                                                                                                                                                                                                                                                                                                                                                                                                                                                                                                                                                                                                                                                                                                                                                                                                                                                                                      |
| Article Type:                   | Research                                                                                                                                                                                                                                                                                                                                                                                                                                                                                                                                                                                                                                                                                                                                                                                                                                                                                                                                                                                                                                                                                                                                                                    |
| Date Submitted by the Author:   | 21-Jul-2018                                                                                                                                                                                                                                                                                                                                                                                                                                                                                                                                                                                                                                                                                                                                                                                                                                                                                                                                                                                                                                                                                                                                                                 |
| Complete List of Authors:       | Wu, Ziying; Xiangya Hospital Central South University, Department of Orthopaedics<br>Ding, Xiang; Xiangya Hospital Central South University, Department of Orthopaedics<br>Lei, Guanghua; Xiangya Hospital Central South University, Department of Orthopaedics<br>Zeng, Chao; Xiangya Hospital Central South University, Department of Orthopaedics<br>Wei, Jie; Xiangya Hospital Central South University, Health Management Center; Central South University Xiangya School of Public Health, Department of Epidemiology and Health Statistics<br>Li, Jiatian; Xiangya Hospital Central South University, Department of Orthopaedics<br>Li, Hui; Xiangya Hospital Central South University, Department of Orthopaedics<br>Yang, Tuo; Xiangya Hospital Central South University, Health Management Center<br>Cui, Yang; Xiangya Hospital Central South University, International Medical Department<br>Xiong, Yilin; Xiangya Hospital Central South University, Department of Orthopaedics<br>Wang, Yilun; Xiangya Hospital Central South University, Department of Orthopaedics<br>Xie, Dongxing; Xiangya Hospital, Central South University, Department of Orthopaedics |
| <b>Primary Subject Heading</b>: | Evidence based practice                                                                                                                                                                                                                                                                                                                                                                                                                                                                                                                                                                                                                                                                                                                                                                                                                                                                                                                                                                                                                                                                                                                                                     |
| Secondary Subject Heading:      | Sports and exercise medicine                                                                                                                                                                                                                                                                                                                                                                                                                                                                                                                                                                                                                                                                                                                                                                                                                                                                                                                                                                                                                                                                                                                                                |
| Keywords:                       | osteoarthritis, pulsed electromagnetic field, meta-analysis, randomized controlled trial                                                                                                                                                                                                                                                                                                                                                                                                                                                                                                                                                                                                                                                                                                                                                                                                                                                                                                                                                                                                                                                                                    |
|                                 |                                                                                                                                                                                                                                                                                                                                                                                                                                                                                                                                                                                                                                                                                                                                                                                                                                                                                                                                                                                                                                                                                                                                                                             |

SCHOLARONE™  
Manuscripts

1  
2  
3  
4  
5  
6  
7  
8  
9  
10  
11  
12  
13  
14  
15  
16  
17  
18  
19  
20  
21  
22  
23  
24  
25  
26  
27  
28  
29  
30  
31  
32  
33  
34  
35  
36  
37  
38  
39  
40  
41  
42  
43  
44  
45  
46  
47  
48  
49  
50  
51  
52  
53  
54  
55  
56  
57  
58  
59  
60

1  
2  
3  
4  
5 **1 Efficacy and Safety of the Pulsed Electromagnetic Field in Osteoarthritis: A Meta-analysis**

6  
7  
8 2 Ziyong Wu<sup>1†</sup>, Xiang Ding<sup>1†</sup>, Guanghua Lei<sup>1</sup>, Chao Zeng<sup>1</sup>, Jie Wei<sup>2,3</sup>, Jiatian Li<sup>1</sup>, Hui Li<sup>1</sup>, Tuo Yang<sup>2</sup>,  
9  
10 3 Yang Cui<sup>4</sup>, Yilin Xiong<sup>1</sup>, Yilun Wang<sup>1\*</sup>, Dongxing Xie<sup>1\*</sup>

11  
12  
13 4 <sup>1</sup>Department of Orthopaedics, Xiangya Hospital, Central South University, Changsha, Hunan Province,  
14  
15 China, 410008;

16  
17 6 <sup>2</sup>Health Management Center, Xiangya Hospital, Central South University, Changsha, Hunan Province,  
18  
19 China. 410008;

20  
21 8 <sup>3</sup>Department of Epidemiology and Health Statistics, Xiangya School of Public Health, Central South  
22  
23 University, Changsha, Hunan Province, China, 410008;

24  
25 10 <sup>4</sup>International Medical Department, Xiangya Hospital, Central South University, Changsha, Hunan  
26  
27 Province, China, 410008.

28  
29 12 **Email address:** Ziyong Wu<sup>1</sup>: wuziyong@csu.edu.cn; Xiang Ding: dingxiang@csu.edu.cn; Guanghua  
30  
31 Lei: lei\_guanghua@csu.edu.cn; Chao Zeng: zengchao@csu.edu.cn; Jie Wei: weij1988@csu.edu.cn;  
32  
33 Jiatian Li: lijatian@csu.edu.cn; Hui Li: doctorl@csu.edu.cn; Tuo Yang: 693673464@qq.com; Yang  
34  
35 Cui: 834492077@qq.com; Yilin Xiong: xiongyilin@csu.edu.cn; Yilun Wang: yilun\_Wang@csu.edu.cn;  
36  
37 Dongxing Xie: xdx1024@csu.edu.cn

38  
39 17 **Correspondence to:** Dongxing Xie<sup>2</sup>, E-mail: xdx1024@csu.edu.cn.  
40  
41  
42  
43  
44  
45  
46  
47  
48  
49  
50  
51  
52  
53  
54

55  
56 <sup>1</sup> Ziyong Wu and Xiang Ding contributed equally to this article.

57 <sup>2</sup> Dongxing Xie and Yilun Wang contributed equally to this article.

1  
2  
3  
4  
5  
6  
7  
8  
9  
10  
11  
12  
13  
14  
15  
16  
17  
18  
19  
20  
21  
22  
23  
24  
25  
26  
27  
28  
29  
30  
31  
32  
33  
34  
35  
36  
37  
38  
39  
40  
41  
42  
43  
44  
45  
46  
47  
48  
49  
50  
51  
52  
53  
54  
55  
56  
57  
58  
59  
60

18 **Abstract**

19 **Objective** To investigate the efficacy and safety of the pulsed electromagnetic field (PEMF) therapy in  
20 treating osteoarthritis (OA).

21 **Design** meta-analysis.

22 **Data sources** PubMed, Embase, the Cochrane Library and Web of Science were searched through  
23 October 13, 2017.

24 **Eligibility criteria for selecting studies** Randomized controlled trials compared the efficacy of PEMF  
25 therapy with sham control in OA patients.

26 **Data extraction and synthesis** Pain, function, adverse effects and characteristics of participants were  
27 extracted. RevMan 5.2 was used to perform statistical analyses.

28 **Results** Twelve trials were included, among which ten trials involved knee OA, two involved cervical  
29 OA and one involved hand OA. The PEMF group showed more significant pain alleviation than the  
30 sham group in knee OA (SMD = -0.54, 95% CI: -1.04, -0.04,  $P = 0.03$ ) and hand OA (SMD = -2.85,  
31 95% CI: -3.65, -2.04,  $P < 0.00001$ ), but not in cervical OA. Similarly, comparing with the sham-control  
32 treatment, significant function improvement was observed in the PEMF group in both knee and hand  
33 OA patients (SMD = -0.34, 95%CI: -0.53, -0.14,  $P = 0.0006$ , and SMD = -1.49, 95%CI: -2.12, -0.86,  $P$   
34  $< 0.00001$ , respectively), but not in cervical OA patients. Sensitivity analyses suggested that the  
35 exposure duration  $\leq 30$  minutes per session exhibited better effects compared with the exposure  
36 duration  $> 30$  minutes per session. Three trials reported adverse events, and the combined results  
37 showed that there was no significant difference between PEMF and the sham group.

38 **Conclusions** PEMF could alleviate pain and improve physical function for knee and hand OA patients,  
39 but not for cervical OA patients. Meanwhile, a short PEMF treatment duration (within 30 minutes) may  
40 achieve more favorable efficacy. However, given the limited number of study available in hand and  
41 cervical OA, the implication of this conclusion should be cautious for hand and cervical OA.

42 **Key words:** osteoarthritis, pulsed electromagnetic field, meta-analysis, randomized controlled trial



1  
2  
3  
4  
5 **43 Strengths and limitations of this study**

6  
7 **44** 1. This study provided a comprehensive assessment on the efficacy and safety of the pulsed  
8  
9 **45** electromagnetic field (PEMF) therapy in patients with knee, hand and cervical osteoarthritis (OA).

10  
11 **46** 2. All included studies in this meta-analysis were randomized controlled trials.

12  
13 **47** 3. There was a high level of heterogeneity among various studies, because different treatment protocols  
14  
15 **48** of PEMF were used in the included studies.

16  
17 **49** 4. There were sparse eligible trials available for the efficacy analysis of hand OA and cervical OA, and  
18  
19 **50** the reliability of the conclusions on these two joints were limited.

## 51 INTRODUCTION

52 Osteoarthritis (OA) is a widespread degenerative disease, which can lead to pain, physical dysfunction  
53 and even disability. The joints most commonly affected by OA include knees, hips, hands, neck, and  
54 feet.<sup>1 2</sup> A variety of medications and physical therapies have been used in the treatment of OA.  
55 However, some widely-applied drugs (e.g., chondroitin, glucosamine, intraarticular hyaluronic acid,  
56 etc.) or physical treatments (e.g., transcutaneous electrical nerve stimulation, and ultrasound) are  
57 actually not advocated by the recent Osteoarthritis Research Society International (OARSI) guidelines.<sup>3</sup>  
58 To date, few effective treatments for knee OA are available.

59 Since the early 1980s, researchers have found that pulsed electromagnetic field (PEMF) therapy  
60 could be applied to accelerate wound healing, repair fracture, reduce hematoma, and treat soft tissue  
61 injury and inflammation.<sup>4</sup> In addition, some studies have demonstrated that PEMF could activate the  
62 signal transduction pathway<sup>5-7</sup> and induce the human articular chondrocyte proliferation.<sup>8</sup> Being a  
63 simple, noninvasive and safe physical therapy, PEMF was considered to be an alternative treatment  
64 regimen for OA. During the past two decades, more than ten randomized controlled trials (RCTs) were  
65 conducted to explore the efficacy of PEMF in the treatment of OA, but no consensus was reached  
66 yet.<sup>9-22</sup> Several previous meta-analyses have evaluated the combined effects of PEMF and pulsed  
67 electrical stimulation on OA.<sup>23 24</sup> However, the mechanisms of PEMF and pulsed electrical stimulation  
68 (PES) was totally different. For example, PES is delivered through capacitive coupling using  
69 transcutaneous electrodes and coupling agents<sup>25</sup> relying on the direct application of an electrical field;  
70 whereas PEMF creates induced current through magnetic impulse.<sup>24</sup> To the best of our knowledge, few  
71 meta-analyses have evaluated the efficacy and safety of single PEMF for OA.

72 To fill in this knowledge gap, the purpose of the present study was to provide a comprehensive  
73 assessment on the efficacy and safety of single PEMF in patients with OA at different joints. It was  
74 hypothesized that PEMF could relieve pain and improve the physical function of OA patients without  
75 producing side effects.

## 77 METHODS

### 78 Search strategies and studies selection

79 The study records were identified in four electronic databases of PubMed, Embase, the Cochrane

1  
2  
3  
4  
5 80 Library and Web of Science through using the combination of a series of keywords and text terms  
6  
7 81 describing OA and PEMF (Appendix 1). The latest literature search was conducted at October 13, 2017.  
8  
9 82 Studies were included if: (1) subjects with symptomatic or radiographic OA, (2) the intervention  
10  
11 83 containing PEMF versus sham-control, (3) the study designed as a RCT, (4) the primary outcome  
12  
13 84 including pain and/or function. Studies were excluded if: (1) in vitro or animal or cadaveric studies, (2)  
14  
15 85 PEMF therapy used for post-operation rehabilitation, (3) other non-medicine therapy (e.g., short wave  
16  
17 86 or PES), (4) cannot get full-text, (5) no data available, (6) unbalanced additional non-pharmacological  
18  
19 87 treatments (e.g., exercise or hot-pack) between groups.  
20  
21 88

### 21 89 **Quality assessment**

22  
23 90 The methodological quality of each included trial was evaluated by two independent authors based on  
24  
25 91 the Cochrane handbook,<sup>26 27</sup> which consists of seven domains: generation of randomization sequences,  
26  
27 92 allocation concealment, blinding of participants and implementers, blinding of outcome assessment,  
28  
29 93 incomplete outcome data, selective reporting and other potential bias. Furthermore, any of divergence  
30  
31 94 was to be discussed and a third consultant was needed if necessary.<sup>28 29</sup> Trials involving three or more  
32  
33 95 high risks of bias were considered as poor methodological quality.<sup>30</sup>  
34  
35 96

### 36 97 **Data extraction and outcome measure**

37  
38 98 All the data extracted by two independent authors. The extracted information included the  
39  
40 99 characteristics of participants (age, gender, body mass index, and duration of OA), balance intervention  
41  
42 100 between groups, number of participants about each trial, treatment protocol of PEMF, and the type of  
43  
44 101 outcome measures, baseline data, post-treatment data and change means, and standard deviations (SD)  
45  
46 102 or the information from which SD could be derived, such as standard error (SE) or confidence interval  
47  
48 103 (CI). The primary goal of this study was to assess the efficacy of pain alleviation and function  
49  
50 104 improvement by applying the PEMF therapy for OA patients. Adverse events were considered as the  
51  
52 105 safety outcome. The efficacy of pain alleviation was measured by change of pain intensity from  
53  
54 106 baseline.<sup>31</sup> Data at the last follow-up time point after treatment was extracted to calculate the change  
55  
56 107 degree from baseline to the last follow-up. According to the recommended hierarchy of continuous  
57  
58 108 pain-related outcomes used in the meta-analyses,<sup>32 33</sup> the outcome data that expressed in higher ranking

1  
2  
3  
4  
5 109 scale was extracted if multiple pain scale measured simultaneously. WOMAC function was preferred  
6  
7 110 measure for function outcome. If a study did not measure or report the WOMAC function, WOMAC  
8  
9 111 total, SF-36 social function score or total score and physician global assessment scores were used in the  
10  
11 112 analysis instead.<sup>34</sup> The number of participants reported adverse events were also extracted in order to  
12  
13 113 evaluate the safety of interventions.

14 114

### 15 115 **Statistical analysis**

16  
17 116 The Review Manager Version 5.2 was used to perform all the statistical analyses. For the reason that  
18  
19 117 outcome of pain and function reported by continuous data and various scales were used for outcome  
20  
21 118 assessment, the standardized mean differences (SMDs) were calculated to compare the effect of pain  
22  
23 119 alleviation and function improvement between different intervention groups. For the safety outcome,  
24  
25 120 the relative risk (RR) was calculated to compare the safety between two groups. Trials reported zero  
26  
27 121 adverse event in both the PEMF and the sham groups were not included in the adverse events  
28  
29 122 analysis.<sup>26</sup> 95% CI was calculated for pooled estimates for each outcome. Statistical significance was  
30  
31 123 considered at  $P < 0.05$ . A random model was applied to pool the data. Q and  $I^2$  statistics were  
32  
33 124 calculated to assess the heterogeneity among the included studies, with a p value  $> 0.05$  of the Q  
34  
35 125 statistics and  $I^2$  value  $< 50\%$  indicating statistical homogeneity. Different exposure duration of PEMF,  
36  
37 126 disease location was hypothesized to influence treatment effect. Therefore, subgroup analyses were  
38  
39 127 performed according to the exposure duration of PEMF therapy (no more than 30 minutes per session  
40  
41 128 or more than 30 minutes per session)<sup>5-7</sup> and location of OA. Funnel plots were inspected to assess  
42  
43 129 publication bias.

44 130

### 45 131 **Patient and public involvement**

46  
47 132 No patients or members of public were involved in the present study. No patients were asked to advise  
48  
49 133 on interpretation or writing up of results. The results of present research will be communicated to the  
50  
51 134 relevant patient community.

52 135

## 53 136 **RESULTS**

### 54 137 **Study screening and characteristics of included studies**

1  
2  
3  
4  
5 138 Figure 1 showed the flow diagram for studies screening. 192 records were identified initially and  
6  
7 139 twelve studies<sup>9-20</sup> met the eligibility criteria and were included in this meta-analysis. The characteristics  
8  
9 140 of included studies were summarized in Table 1. The risk of bias assessment (Figure 2) showed that  
10  
11 141 one study<sup>9</sup> was regarded as low quality.

12 142

### 13 143 **Pain relief**

14 144 Twelve RCTs were included for meta-analysis of pain management.<sup>9-20</sup> As shown in Figure 3, PEMF  
15  
16 145 group achieved a significant difference in pain improvement compared with sham group (SMD = -0.94,  
17  
18 146 95% CI: -1.49, -0.39,  $P = 0.0008$ ), while significant heterogeneity was observed ( $I^2 = 92%$ ;  $P <$   
19  
20 147  $0.00001$ ). Subgroup analysis showed that significant differences were observed between the PEMF and  
21  
22 148 sham group on pain improvement in knee OA (SMD = -0.54, 95% CI: -1.04, -0.04,  $P = 0.03$ ) and hand  
23  
24 149 OA patients (SMD = -2.85, 95% CI: -3.65, -2.04,  $P < 0.00001$ ), whereas no significant difference was  
25  
26 150 achieved between groups in cervical OA patients (SMD = -2.33, 95% CI: -6.26, 1.61,  $P = 0.25$ ). As for  
27  
28 151 subgroup analysis of different exposure duration, significant difference was observed with exposure  
29  
30 152 duration within 30 minutes (SMD = -1.01, 95%CI: -1.64, -0.39,  $P = 0.001$ ), and no significant  
31  
32 153 difference was achieved between intervention groups with exposure duration more than 30 minutes  
33  
34 154 (SMD = -0.61, 95%CI: -2.25, 1.02,  $P = 0.46$ ) (see Table 2). Besides, substantial asymmetry was not  
35  
36 155 identified in the funnel plot.

37 156

### 38 157 **Function improvement**

39  
40 158 Eight RCTs were included for meta-analysis of physical function improvement.<sup>9 10 12 13 15 16 19 20</sup> Figure 4  
41  
42 159 illustrated the beneficial effect of PEMF on physical function improvement (SMD = -0.45, 95% CI:  
43  
44 160 -0.71, -0.19,  $P = 0.0005$ ), and substantial heterogeneity was observed ( $I^2 = 54%$ ;  $P = 0.03$ ). However,  
45  
46 161 the subgroup analysis of different OA locations suggested significant differences both in knee OA and  
47  
48 162 hand OA (SMD = -0.34, 95%CI: -0.53, -0.14,  $P = 0.0006$ , and SMD = -1.49, 95%CI: -2.12, -0.86,  $P <$   
49  
50 163  $0.00001$ , respectively, see in Table 2), whereas there was no significant difference between groups in  
51  
52 164 cervical OA patients (SMD = -0.27, 95% CI: -0.71, 0.16,  $P = 0.22$ ). In addition, there was a significant  
53  
54 165 difference on effect of function improvement with exposure duration within 30 minutes (SMD = -0.50,  
55  
56 166 95%CI: -0.81, -0.18,  $P = 0.002$ ), and no significant difference was observed in more than 30 minutes

7

1  
2  
3  
4  
5 167 group (SMD = -0.33, 95%CI: -0.82, 0.17,  $P = 0.20$ ). Funnel plot also did not identify substantial  
6 168 asymmetry.

7  
8 169

#### 9 10 170 **Adverse events**

11 171 There were ten RCTs that reported adverse events.<sup>9-11 13 14 16-20</sup> Seven of them claimed that no adverse  
12 172 events were observed both in PEMF and sham group.<sup>9 10 13 14 17 18 20</sup> Three trials reported the adverse  
13 173 events of each treatment group, which mainly included increased knee pain, hip pain, spine pain,  
14 174 vomiting, warming sensation, increased blood pressure, numbness of feet, paraesthesia of foot and  
15 175 cardiomyopathy, and there were no AE related drop outs in each trial.<sup>11 16 19</sup> There was no significant  
16 176 difference between the PEMF and the sham group regarding adverse events (RR = 0.83, 95%CI: 0.26,  
17 177 2.64,  $P = 0.75$ ) (Figure 5). Substantial asymmetry was not identified in the funnel plot.

18  
19  
20  
21  
22  
23 178

#### 24 25 26 179 **DISCUSSION**

27 180 This study provided a comprehensive assessment of the scientific literature on the efficacy and safety  
28 181 of the PEMF therapy in patients with knee, hand and cervical OA. The results showed that, in  
29 182 comparison with the sham-control group, PEMF was more effective in both pain relief and function  
30 183 improvement for patients with knee OA and hand OA, but not for patients with cervical OA. In  
31 184 addition, PEMF did not lead to specific adverse events compared with the sham control group.  
32 185 Interestingly, a short duration of PEMF treatment for  $\leq 30$  minutes per session seems to achieve more  
33 186 favorable results. This finding may have significant implications for the clinical application of PEMF  
34 187 in the OA field.

35 188 As a noninvasive, safe and simple therapy, the PEMF therapy is widely used to treat soft injury  
36 189 and bone fracture, relieve pain and inflammation, as well as many other types of diseases and  
37 190 pathologies.<sup>35</sup> In the past two decades, researchers have turned their attention to the efficacy of treating  
38 191 OA. Some previous systematic reviews have combined PEMF and other physical therapies together to  
39 192 examine their efficacy in OA patients, which might bias the results. McCarthy *et al.*<sup>36</sup> demonstrated that  
40 193 PEMF and short-wave together had limited effect in treating knee OA. In contrast, We *et al.*<sup>37</sup> reported  
41 194 different results. Based on the follow-up data extracted from different time points for subgroup analysis,  
42 195 they concluded that the combination of PEMF and short-wave was more effective in functional

1  
2  
3  
4  
5 196 improvement, but not in pain relief, at 8 weeks after the first treatment.<sup>37</sup> It should be noted that  
6  
7 197 short-wave therapy was considered to be another type of physical therapy which was different from  
8  
9 198 PEMF.<sup>38</sup> Similarly, another study conducted by Li *et al.*<sup>24</sup> reported that PEMF and PES might provide  
10  
11 199 moderate benefit for OA sufferers in terms of pain relief. However, considering that PES relies on the  
12  
13 200 direct application of an electrical field and PEMF creates induced current through magnetic impulse,  
14  
15 201 the combined analysis of these two physical therapies may also bias the results.

16 202 The results of the present study showed that PEMF had significant effects in pain alleviation and  
17  
18 203 function improvement comparing with the sham-control group in knee and hand OA patients, but not in  
19  
20 204 cervical OA patients. The poor efficacy of the treatment for cervical OA may be due to the anatomical  
21  
22 205 factors of cervical spine. The neurovascular structures contained in the cervical spinal canal may be  
23  
24 206 compressed due to cervical OA, which will then induce a series of symptoms, such as the upper limb  
25  
26 207 nerve root pain induced by nerve root compression; the chronic vertebral and basilar arterial  
27  
28 208 insufficiency due to compression of vertebral arteries; the numbness of limbs and easiness to falling  
29  
30 209 caused by spinal cord compression.<sup>39 40</sup> Although some studies showed that PEMF could enhance  
31  
32 210 articular cartilage regeneration,<sup>41 42</sup> no evidence yet demonstrated that PEMF can reduce osteophytes  
33  
34 211 formation, which may induce nerve root compression that can lead to deterioration of pain and function.  
35  
36 212 In addition, the limited number of studies available is another reason should not be ignored.

37 213 The present study further examined the association between the exposure duration of PEMF and  
38  
39 214 efficacy for patients with OA. The results suggested that the exposure duration  $\leq 30$  minutes per  
40  
41 215 session could achieved better efficacy both in pain relief and function improvement. The reason could  
42  
43 216 be explained by several previous laboratory studies. A recent study exploring the effects of different  
44  
45 217 PEMF treatment durations (ranged from 5 to 60 minutes) over the mesenchymal stem cells (MSC)  
46  
47 218 chondrogenic differentiation reported that the expression of MSC chondrogenic markers showed the  
48  
49 219 greatest increase in response to 5-20 minutes PEMF treatment.<sup>43</sup> Similarly, another two studies which  
50  
51 220 have shown that PEMF could activate cellular signaling transduction rapidly within 5-10 minutes,  
52  
53 221 whereas the signaling might be largely benumbed after 30 minutes.<sup>5-7</sup>

54 222 Nevertheless, limitations of the present study should be acknowledged. Firstly, since different  
55  
56 223 treatment protocols of PEMF were used in the included studies, there was a high level of heterogeneity  
57  
58 224 among various studies. Secondly, there were sparse eligible trials available for the efficacy analysis of

1  
2  
3  
4  
5 225 hand OA and cervical OA, and the accuracy of the conclusions on these two joints were limited. In  
6  
7 226 addition, because the number of studies reporting the pulse frequency of application, pulse intensity,  
8  
9 227 pulsed rate and other parameters of PEMF was very limited, subgroup analyses were restricted  
10  
11 228 according to these parameters of PEMF. Finally, morphological change is a meaningful outcome for  
12  
13 229 exploring the treatment efficacy of PEMF further;<sup>19</sup> however, the morphological changes were not  
14  
15 230 reported in the present study due to the lack of relevant data. More trials are needed to evaluate the  
16  
17 231 morphological changes after PEMF therapy.  
18

### 19 233 **CONCLUSION**

20  
21 234 The present study revealed that PEMF could alleviate pain and improve physical function for knee and  
22  
23 235 hand OA patients, but not for cervical OA. Meanwhile, a short PEMF treatment duration (within 30  
24  
25 236 minutes) may achieve more favorable efficacy. However, given the limited number of study available  
26  
27 237 in hand and cervical OA, the implication of this conclusion should be cautious for hand and cervical  
28  
29 238 OA.  
30  
31  
32  
33  
34  
35  
36  
37  
38  
39  
40  
41  
42  
43  
44  
45  
46  
47  
48  
49  
50  
51  
52  
53  
54  
55  
56  
57  
58  
59  
60



1  
2  
3  
4  
5  
6  
7  
8  
9  
10  
11  
12  
13  
14  
15  
16  
17  
18  
19  
20  
21  
22  
23  
24  
25  
26  
27  
28  
29  
30  
31  
32  
33  
34  
35  
36  
37  
38  
39  
40  
41  
42  
43  
44  
45  
46  
47  
48  
49  
50  
51  
52  
53  
54  
55  
56  
57  
58  
59  
60

239 **Author contributions**

240 ZYW, DXX, XD and YLW were responsible for conception and design of the study. ZYW, XD, DXX,  
241 and YLW contributed to study retrieval. YC and YLX contributed to quality assessment. HL, TY and  
242 JTL contributed to data collection. JW and CZ contributed to statistical analysis. ZYW, XD, DXX and  
243 YLW drafted the manuscript. CZ and GHJ contributed to revision of the manuscript. All authors read  
244 and approved the final manuscript.

245 **Declaration of funding**

246 This work was supported by the National Natural Science Foundation of China (81472130, 81672225,  
247 81601941, 81501923, 81772413, 81702207, 81702206), the Postdoctoral Science Foundation of  
248 Central South University (182130), the Young Investigator Grant of Xiangya Hospital, Central South  
249 University (2016Q03, 2016Q06), the Scientific Research Project of the Development and Reform  
250 Commission of Hunan Province ([2013]1199), the Scientific Research Project of Science and  
251 Technology Office of Hunan Province (2013SK2018), the Key Research and Development Program of  
252 Hunan Province (2016JC2038), the Xiangya Clinical Big Data System Construction Project of Central  
253 South University (45), the Clinical Scientific Research Foundation of Xiangya Hospital, Central South  
254 University (2015L03), the Natural Science Foundation of Hunan Province (2017JJ3491, 2017JJ3492),  
255 the Postgraduate Independent Exploration and Innovation Project of Central South University  
256 (2018ts909), the Postgraduate Independent Exploration and Innovation Project of Hunan Province  
257 (CX2017B065), and the Wu Jieping Medical Foundation (320.6750.17258).

258 **Declaration of financial/other relationships**

259 None of the authors has any financial and personal relationships with other people or organizations that  
260 could potentially and inappropriately influence this work and its conclusions.

261 **Competing Interests statement:** All authors declare that they have no conflict of interest.

262 **Data sharing statement:** No additional data available.

263

264 **REFERENCES:**

- 265 1. Felson DT, Lawrence RC, Dieppe PA, et al. Osteoarthritis: new insights. Part 1: the disease and its  
266 risk factors. *Ann Intern Med* 2000;133(8):635-46.
- 267 2. Jordan KM, Arden NK, Doherty M, et al. EULAR Recommendations 2003: an evidence based  
268 approach to the management of knee osteoarthritis: Report of a Task Force of the Standing  
269 Committee for International Clinical Studies Including Therapeutic Trials (ESCISIT). *Ann Rheum*  
270 *Dis* 2003;62(12):1145-55.
- 271 3. McAlindon TE, Bannuru RR, Sullivan MC, et al. OARSI guidelines for the non-surgical  
272 management of knee osteoarthritis. *Osteoarthritis Cartilage* 2014;22(3):363-88.
- 273 4. Raji AR, Bowden RE. Effects of high peak pulsed electromagnetic fields on degeneration and  
274 regeneration of the common peroneal nerve in rat. *Lancet* 1982;2(8295):444-5.
- 275 5. Uckun FM, Kurosaki T, Jin J, et al. Exposure of B-lineage lymphoid cells to low energy  
276 electromagnetic fields stimulates Lyn kinase. *J Biol Chem* 1995;270(46):27666-70.
- 277 6. Dibirdik I, Kristupaitis D, Kurosaki T, et al. Stimulation of Src family protein-tyrosine kinases as a  
278 proximal and mandatory step for SYK kinase-dependent phospholipase Cgamma2 activation in  
279 lymphoma B cells exposed to low energy electromagnetic fields. *J Biol Chem* 1998;273(7):4035-9.
- 280 7. Kristupaitis D, Dibirdik I, Vassilev A, et al. Electromagnetic field-induced stimulation of Bruton's  
281 tyrosine kinase. *J Biol Chem* 1998;273(20):12397-401.
- 282 8. De Mattei M, Caruso A, Pezzetti F, et al. Effects of pulsed electromagnetic fields on human  
283 articular chondrocyte proliferation. *Connective Tissue Res* 2001;42(4):269-79.
- 284 9. Ay S, Evcik D. The effects of pulsed electromagnetic fields in the treatment of knee osteoarthritis:  
285 a randomized, placebo-controlled trial. *Rheumatol Int* 2009;29(6):663-6.
- 286 10. Bagnato GL, Miceli G, Marino N, et al. Pulsed electromagnetic fields in knee osteoarthritis: a  
287 double blind, placebo-controlled, randomized clinical trial. *Rheumatology* 2016;55(4):755-62.
- 288 11. Fischer G, Pelka R, Barovic J. Adjuvante Behandlung der Gonarthrose mit schwachen pulsierenden  
289 Magnetfeldern. *Aktuelle Rheumatologie* 2006;31(4):226-33.
- 290 12. Kanat E, Alp A, Yurtkuran M. Magnetotherapy in hand osteoarthritis: A pilot trial. *Complement*  
291 *Ther Med* 2013;21(6):603-8.
- 292 13. Lee J, Park J, Sheen D, et al. The Effect of Pulsed Electromagnetic Fields in the Treatment of Knee  
293 Osteoarthritis. Report of Double-blind, Placebo-controlled, Randomized Trial. *J Korean Rheum*  
294 *Assoc* 2004;11(2):143-50.
- 295 14. Nelson FR, Zvirbulis R, Pilla AA. Non-invasive electromagnetic field therapy produces rapid and  
296 substantial pain reduction in early knee osteoarthritis: a randomized double-blind pilot study.  
297 *Rheumatol Int* 2013;33(8):2169-73.
- 298 15. Nicolakis P, Kollmitzer J, Crevenna R, et al. Pulsed magnetic field therapy for osteoarthritis of the  
299 knee--a double-blind sham-controlled trial. *Wien Klin Wochenschr* 2002;114(15-16):678-84.
- 300 16. Pipitone N, Scott DL. Magnetic Pulse Treatment for Knee Osteoarthritis: A Randomised,  
301 Double-Blind, Placebo-Controlled Study. *Curr Med Res Opin* 2001;17:190-6.
- 302 17. Sutbeyaz ST, Sezer N, Koseoglu BF. The effect of pulsed electromagnetic fields in the treatment of  
303 cervical osteoarthritis: a randomized, double-blind, sham-controlled trial. *Rheumatol Int*  
304 2006;26(4):320-4.

12

- 1  
2  
3  
4 305 18. Tejero Sánchez M, Muniesa PM, Díaz SP, et al. Effects of magnetotherapy in knee pain secondary  
5 306 to knee osteoarthritis. A prospective double-blind study. *Patología Del Aparato Locomotor*  
6 307 2003;1(3):190-5.
- 8 308 19. Thamsborg G, Florescu A, Oturai P, et al. Treatment of knee osteoarthritis with pulsed  
9 309 electromagnetic fields: a randomized, double-blind, placebo-controlled study. *Osteoarthritis*  
10 310 *Cartilage* 2005;13(7):575-81.
- 12 311 20. Trock DH, Bollet AJ, Markoll R. The effect of pulsed electromagnetic fields in the treatment of  
13 312 osteoarthritis of the knee and cervical spine. Report of randomized, double blind, placebo controlled  
14 313 trials. *J Rheumatol* 1994;21(10):1903-11.
- 16 314 21. Dundar U, Asik G, Ulasli AM, et al. Assessment of pulsed electromagnetic field therapy with  
17 315 Serum YKL-40 and ultrasonography in patients with knee osteoarthritis. *Int J Rheum Dis*  
18 316 2016;19(3):287-93.
- 19 317 22. Özgüçlü E, Çetin A, Çetin M, et al. Additional effect of pulsed electromagnetic field therapy on  
20 318 knee osteoarthritis treatment: a randomized, placebo-controlled study. *Clin Rheumatol*  
21 319 2010;29(8):927-31.
- 23 320 23. Negm A, Lorbergs A, Macintyre NJ. Efficacy of low frequency pulsed subsensory threshold  
24 321 electrical stimulation vs placebo on pain and physical function in people with knee osteoarthritis:  
25 322 systematic review with meta-analysis. *Osteoarthritis Cartilage* 2013;21(9):1281-9.
- 27 323 24. Li SS, Yu B, Zhou D, et al. Electromagnetic fields for treating osteoarthritis. *Cochrane DB Syst Rev*  
28 324 2013;Issue 12. Art. No.: CD003523.
- 29 325 25. Fary RE, Carroll GJ, Briffa TG, et al. The effectiveness of pulsed electrical stimulation in the  
30 326 management of osteoarthritis of the knee: results of a double-blind, randomized, placebo-controlled,  
31 327 repeated-measures trial. *Arthritis Rheum* 2011;63(5):1333-42.
- 32 328 26. Higgins JPT, Green S, Browne KD. *Cochrane Handbook for Systematic Reviews of Interventions:*  
33 329 *A Handbook*. Hoboken: John Wiley & Sons, Incorporated, 2010:439.
- 35 330 27. Zeng C, Li YS, Wei J, et al. Analgesic effect and safety of single-dose intra-articular magnesium  
36 331 after arthroscopic surgery: a systematic review and meta-analysis. *Sci Rep* 2016;6:38024.
- 37 332 28. Xie DX, Zeng C, Wang YL, et al. A Single-Dose Intra-Articular Morphine plus Bupivacaine versus  
38 333 Morphine Alone following Knee Arthroscopy: A Systematic Review and Meta-Analysis. *PLoS One*  
39 334 2015;10(10):e140512.
- 41 335 29. Cui Y, Yang T, Zeng C, et al. Intra-articular bupivacaine after joint arthroplasty: a systematic  
42 336 review and meta-analysis of randomised placebo-controlled studies. *BMJ Open* 2016;6(7):e11325.
- 43 337 30. Zeng C, Wei J, Li H, et al. Effectiveness and safety of Glucosamine, chondroitin, the two in  
44 338 combination, or celecoxib in the treatment of osteoarthritis of the knee. *Sci Rep* 2015;5:16827.
- 46 339 31. Zeng C, Li H, Yang T, et al. Electrical stimulation for pain relief in knee osteoarthritis: systematic  
47 340 review and network meta-analysis. *Osteoarthritis Cartilage* 2015;23(2):189-202.
- 48 341 32. Jüni P, Reichenbach S, Dieppe P. Osteoarthritis: rational approach to treating the individual. *Best*  
49 342 *Practice & Research Clinical Rheumatology* 2006;20(4):721-40.
- 51 343 33. Reichenbach S, Sterchi R, Scherer M, et al. Meta-analysis: Chondroitin for Osteoarthritis of the  
52 344 Knee or Hip. *Ann Intern Med* 2007;146(8):580.
- 53 345 34. Zeng C, Li H, Yang T, et al. Effectiveness of continuous and pulsed ultrasound for the management  
54 346 of knee osteoarthritis: a systematic review and network meta-analysis. *Osteoarthritis and Cartilage*  
55 347 2014;22(8):1090-9.

- 1  
2  
3  
4 348 35. Salomonowitz G, Friedrich M, Guntert BJ. Medical relevance of magnetic fields in pain therapy.  
5 349 *Schmerz* 2011;25(2):157.  
6  
7 350 36. McCarthy CJ, Callaghan MJ, Oldham JA. Pulsed electromagnetic energy treatment offers no  
8 351 clinical benefit in reducing the pain of knee osteoarthritis: a systematic review. *BMC Musculoskelet*  
9 352 *Disord* 2006;7:51.  
10 353 37. Ryang WS, Koog YH, Jeong KI, et al. Effects of pulsed electromagnetic field on knee osteoarthritis:  
11 354 a systematic review. *Rheumatology (Oxford)* 2013;52(5):815-24.  
12 355 38. Shamliyan TA, Wang SY, Olson-Kellogg B, et al. *Physical Therapy Interventions for Knee Pain*  
13 356 *Secondary to Osteoarthritis*. Rockville (MD): Agency for Healthcare Research and Quality (US),  
14 357 2012.  
15 358 39. Valat JP, Lioret E. Cervical spine osteoarthritis. *La Revue Du Praticien* 1996;46(18):2206.  
16 359 40. Wilder FV, Fahlman L, Donnelly R. Radiographic cervical spine osteoarthritis progression rates: a  
17 360 longitudinal assessment. *Rheumatol Int* 2011;31(1):45-8.  
18 361 41. Ciombor DM, Aaron RK, Wang S, et al. Modification of osteoarthritis by pulsed electromagnetic  
19 362 field - A morphological study. *Osteoarthritis Cartilage* 2003;11(6):455-62.  
20 363 42. Chang CH, Loo ST, Liu HL, et al. Can low frequency electromagnetic field help cartilage tissue  
21 364 engineering? *J Biomed Mater Res a* 2010;92(3):843-51.  
22 365 43. Parate D, Franco-Obregon A, Frohlich J, et al. Enhancement of mesenchymal stem cell  
23 366 chondrogenesis with short-term low intensity pulsed electromagnetic fields. *Sci Rep*  
24 367 2017;7(1):9421.  
25 368

Table 1. Characteristics of included studies

| Studies        | Balance | N  | Location of OA | Age, years (mean ± SD) | Female % | Mean BMI, kg/m <sup>2</sup> (mean ± SD) | Duration of OA, years (mean ± SD) | Exposure of intervention     |                       | Time point for outcome measure                       |
|----------------|---------|----|----------------|------------------------|----------|-----------------------------------------|-----------------------------------|------------------------------|-----------------------|------------------------------------------------------|
|                |         |    |                |                        |          |                                         |                                   | Daily time                   | Exposure duration     |                                                      |
| Ay 2009        | PEMF    | 55 | Knee           | 58.9 ± 8.8             | 70.0     | NA                                      | 3.6 ± 4.6                         | 30 minutes                   | 3 weeks (15 sessions) | After treatment                                      |
|                | Placebo |    |                | 57.7 ± 6.5             | 76.0     | NA                                      | 3.5 ± 4.1                         |                              |                       |                                                      |
| Bagnato 2016   | PEMF    | 60 | Knee           | 67.7 ± 10.9            | 70.0     | 27.4 ± 4.3                              | 12.1 ± 8.2                        | A minimum of 12 hours        | 1 month (30 sessions) | 1 month                                              |
|                | Placebo |    |                | 68.6 ± 11.9            | 73.3     | 27.7 ± 4.6                              | 12.4 ± 9.1                        |                              |                       |                                                      |
| Fischer 2006   | PEMF    | 71 | Knee           | 52.1 ± 1.9             | 71.4     | 29.2 ± 1.0                              | 6.8 ± 0.7                         | 16 minutes                   | 6 weeks (42 sessions) | Therapy-End, 4weeks after therapy-End                |
|                | Placebo |    |                | 62.1 ± 1.5             | 72.2     | 29.4 ± 0.7                              | 6.2 ± 0.6                         |                              |                       |                                                      |
| Lee 2004       | PEMF    | 51 | Knee           | 63.5 ± 8.9             | 8.0      | 26.1 ± 3.1                              | 12.7 ± 7.5                        | 30 minutes                   | 6weeks (18 sessions)  | 3, 6 weeks during treatment, 4 weeks after finishing |
|                | Placebo |    |                | 66.2 ± 8.8             | 11.5     | 27.1 ± 3.7                              | 12.8 ± 7.6                        |                              |                       |                                                      |
| Nelson 2013    | PEMF    | 34 | Knee           | 55.5 ± 2.5             | 73.7     | 33.5 ± 1.9                              | NA                                | 15 minutes                   | 6 weeks (84 sessions) | 14, 29, 42 days                                      |
|                | Placebo |    |                | 58.4 ± 2.5             | 66.7     | 34.7 ± 1.7                              | NA                                |                              |                       |                                                      |
| Nicolakis 2002 | PEMF    | 36 | Knee           | 69.0 ± 5.0             | 73.3     | NA                                      | NA                                | 30 minutes                   | 6 weeks (84 sessions) | After treatment                                      |
|                | Placebo |    |                | 67.0 ± 7.0             | 47.1     | NA                                      | NA                                |                              |                       |                                                      |
| Pipitone 2001  | PEMF    | 75 | Knee           | 62.0 (40–84) *         | 35.3     | NA                                      | 4.0 (1.0–18.0) *                  | 10 minutes and 3 times a day | 6 weeks               | 2, 4, 6 weeks after study entry                      |
|                | Placebo |    |                | 64.0 (48–84) *         | 20.0     | NA                                      | 8.0 (0.5–31.0) *                  |                              |                       |                                                      |

|                     |                 |                                      |    |          |                            |              |                          |                          |            |                         |                                                            |
|---------------------|-----------------|--------------------------------------|----|----------|----------------------------|--------------|--------------------------|--------------------------|------------|-------------------------|------------------------------------------------------------|
| Tejero Sánchez 2003 | PEMF<br>Placebo | None                                 | 83 | Knee     | 67.4 ± 8.7<br>68.0 ± 8.3   | 87.9<br>88.2 | NA<br>NA                 | NA<br>NA                 | 30 minutes | 20 sessions             | The end of therapy, one month after therapy                |
| Thamsborg 2005      | PEMF<br>Placebo | None                                 | 83 | Knee     | 60.4 ± 8.7<br>59.6 ± 8.6   | 46.5<br>61.0 | 27.0 ± 4.0<br>27.5 ± 5.7 | 7.5 ± 5.2<br>7.9 ± 7.7   | 2 hours    | 6 weeks (30 sessions)   | 2 weeks, end of treatment, 6 weeks after end of treatment  |
| Trock 1994 §        | PEMF<br>Placebo | Do not change basic therapeutic      | 86 | Knee     | 69.2 ± 11.5<br>65.8 ± 11.7 | 69.0<br>70.5 | NA<br>NA                 | 9.1 ± 8.9<br>7.4 ± 7.2   | 30 minutes | 4-5 weeks (18 sessions) | Midway of therapy, the last treatment, and one month later |
| Sutbeyaz 2006       | PEMF<br>Placebo | None                                 | 34 | Cervical | 43.2 ± 10.3<br>42.1 ± 10.1 | 64.7<br>66.7 | NA<br>NA                 | NA<br>NA                 | 30 minutes | 3 weeks (42 sessions)   | After treatment                                            |
| Trock 1994 §        | PEMF<br>Placebo | Do not change basic therapeutic      | 81 | Cervical | 61.2 ± 13.4<br>67.4 ± 8.0  | 28.6<br>30.8 | NA<br>NA                 | 7.4 ± 6.7<br>8.1 ± 8.0   | 30 minutes | 4-5 weeks (18 sessions) | Midway of therapy, the last treatment, and one month later |
| Kanat 2013          | PEMF<br>Placebo | Active range of motion and resistive | 50 | Hand     | 64.0 ± 2.60<br>62.0 ± 2.40 | NA<br>NA     | NA<br>NA                 | 5.01 ± 2.3<br>4.31 ± 4.7 | 20 minutes | 10 days                 | After treatment                                            |

N, number of participates; BMI, body mass index; OA, osteoarthritis; PEMF, pulsed electromagnetic field; NA, not available; TENS, transcutaneous electrical nerve stimulation.

\* Age and duration of OA in this trial were expressed by median (range).

§ This trial provided data of knee OA and cervical OA patients respectively.

Table 2. Results of subgroup analyses.

| Reason for subgroup analyses | Pooled Results of Subgroups |        | Heterogeneity of Subgroups |         |           |
|------------------------------|-----------------------------|--------|----------------------------|---------|-----------|
|                              | SMD/RR                      | 95% CI | I <sup>2</sup> (%)         | p Value |           |
| <b>Pain</b>                  |                             |        |                            |         |           |
| Location                     | Knee OA                     | -0.54  | [-1.04, 0.04]              | 88      | 0.03      |
|                              | Cervical OA                 | -2.33  | [-6.26, 1.61]              | 97      | 0.25      |
|                              | Hand OA                     | -2.85  | [-3.65, -2.04]             | NA      | < 0.00001 |
| Exposure duration            | No more than 0.5hr/session  | -1.01  | [-1.64, -0.39]             | 91      | 0.001     |
|                              | More than 0.5hr/session     | -0.61  | [-2.25, 1.02]              | 95      | 0.46      |
| <b>Function</b>              |                             |        |                            |         |           |
| Location                     | Knee OA                     | -0.34  | [-0.53, -0.14]             | 0       | 0.0006    |
|                              | Cervical OA                 | -0.27  | [-0.71, 0.16]              | NA      | 0.22      |
|                              | Hand OA                     | -1.49  | [-2.12, -0.86]             | NA      | < 0.00001 |
| Exposure duration            | No more than 0.5hr/session  | -0.50  | [-0.81, -0.18]             | 59      | 0.002     |
|                              | More than 0.5hr/session     | -0.33  | [-0.82, 0.17]              | 54      | 0.20      |
| <b>Adverse event</b>         |                             |        |                            |         |           |
| Exposure duration            | No more than 0.5hr/session  | 0.42   | [0.14, 1.29]               | 0       | 0.13      |
|                              | More than 0.5hr/session     | 1.95   | [0.81, 4.71]               | NA      | 0.14      |

OA, osteoarthritis; SMD, standard mean difference; RR, relative risk; CI, confidence interval; NA, not available.

1  
2  
3 Figure 1. Flowchart of studies screening process based on the PRISMA guideline.

4 OA: osteoarthritis, PEMF: pulsed electromagnetic field  
5

6  
7 Figure 2. Risk of bias summary of twelve included studies.

8 The green background with “+” means low risk of bias; the red background with “-” means high risk of  
9 bias; the yellow background with “?” means unknown risk of bias. Trials involving three or more high  
10 risks of bias were considered as poor methodological quality.  
11

12  
13 Figure 3. Forest plot of PEMF compared to sham-control on pain.

14 PEMF: pulsed electromagnetic field

15 Significant differences were observed between the PEMF and sham group on pain improvement in  
16 knee OA ( $P = 0.03$ ) and hand OA patients ( $P < 0.00001$ ), whereas no significant difference was  
17 achieved between groups in cervical OA patients ( $P = 0.25$ ).  
18

19  
20 Figure 4. Forest plot of PEMF compared to sham-control on function.

21 PEMF: pulsed electromagnetic field

22 Significant differences both in knee OA ( $P = 0.0006$ ) and hand OA ( $P < 0.00001$ ), whereas there was  
23 no significant difference between groups in cervical OA patients ( $P = 0.22$ ).  
24

25  
26 Figure 5. Forest plot of PEMF compared to sham-control on adverse events.

27 PEMF: pulsed electromagnetic field

28 There was no significant difference between the PEMF and the sham group regarding adverse events ( $P$   
29  $= 0.75$ ).  
30  
31  
32  
33  
34  
35  
36  
37  
38  
39  
40  
41  
42  
43  
44  
45  
46  
47  
48  
49  
50  
51  
52  
53  
54  
55  
56  
57  
58  
59  
60



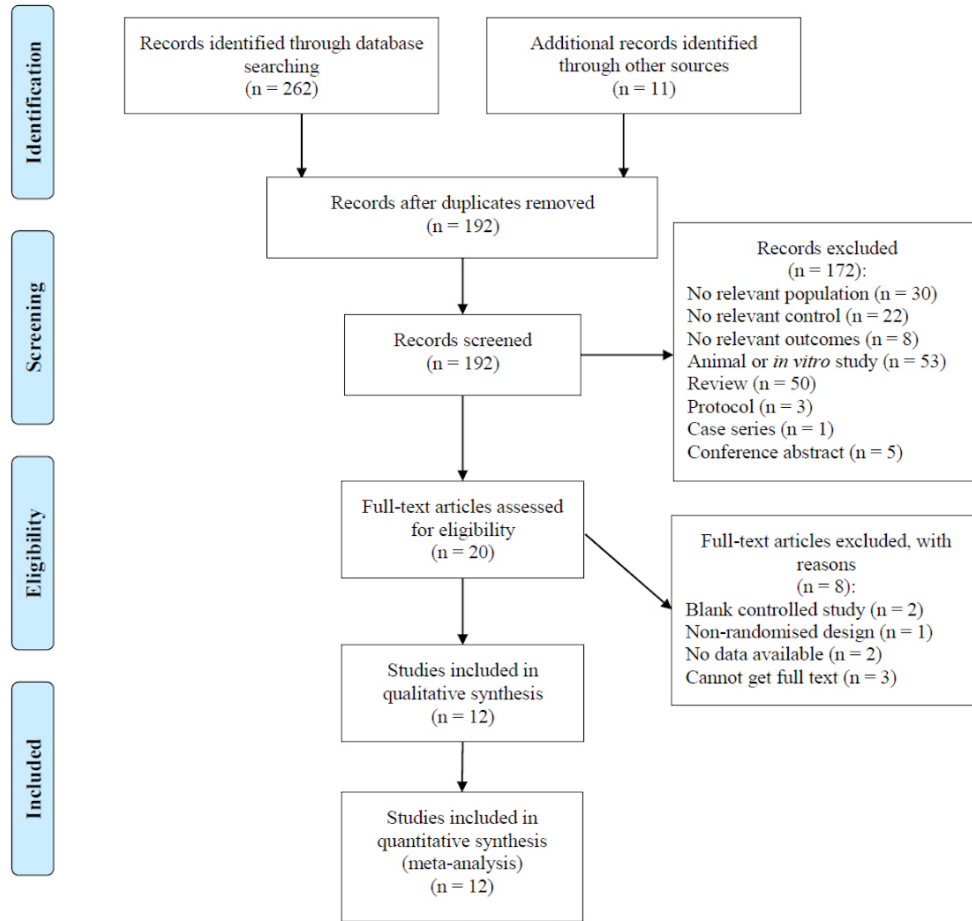

Figure 1. Flowchart of studies screening process based on the PRISMA guideline.  
 OA: osteoarthritis, PEMF: pulsed electromagnetic field

95x90mm (300 x 300 DPI)



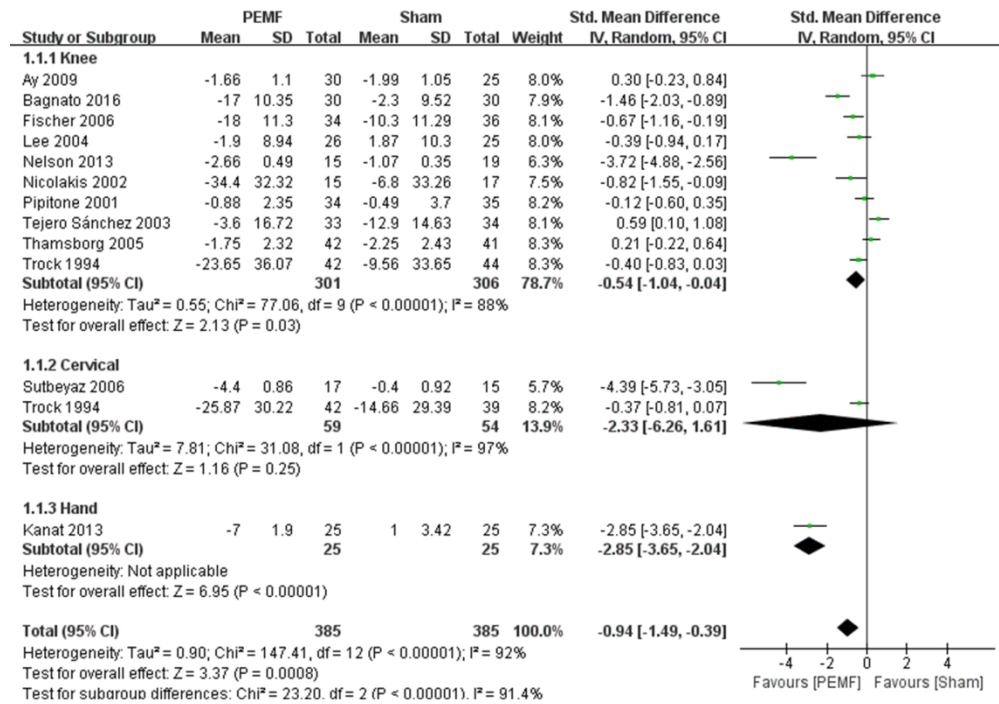

Figure 3. Forest plot of PEMF compared to sham-control on pain.  
PEMF: pulsed electromagnetic field

173x123mm (300 x 300 DPI)

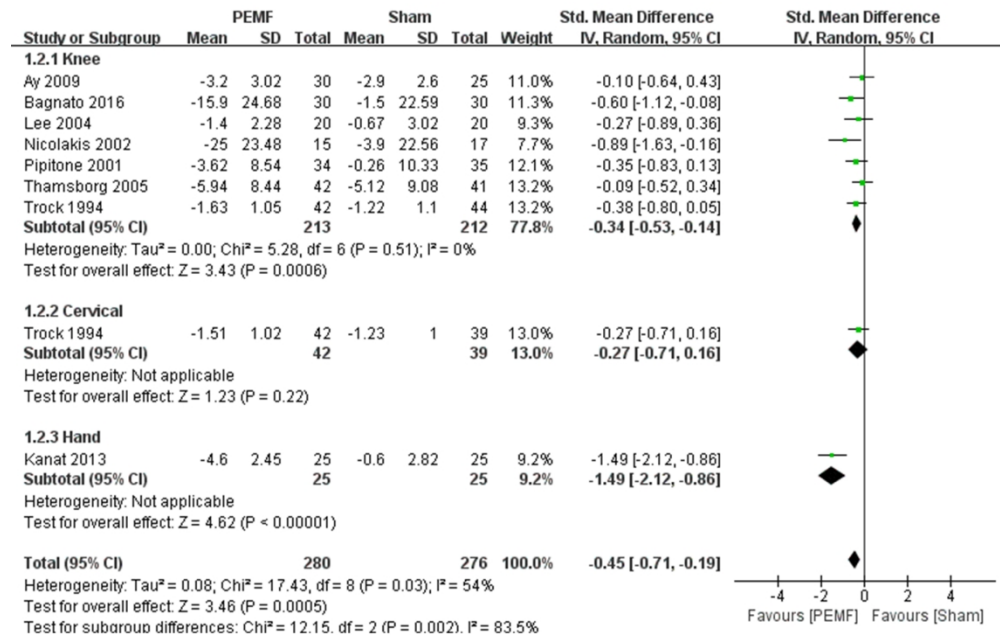

Figure 4. Forest plot of PEMF compared to sham-control on function.  
PEMF: pulsed electromagnetic field

173x109mm (300 x 300 DPI)

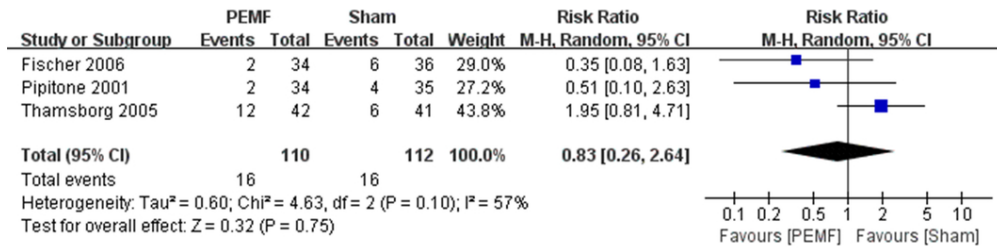

Figure 5. Forest plot of PEMF compared to sham-control on adverse events.  
 PEMF: pulsed electromagnetic field

89x22mm (300 x 300 DPI)

## Search Strategies

### PubMed search strategy

#1 Pulsed electromagnetic field[Title/Abstract]

#2 Pulsed electromagnetic fields[Title/Abstract]

#3 Pulsed electromagnetic field[mesh]

**#4 #1 or #2 or #3**

#5 Osteoarthritis[Mesh]

#6 (osteoarthro\*[tiab] or gonarthriti\*[tiab] or gonarthro\*[tiab] or coxarthriti\*[tiab] or coxarthro\*[tiab] or osteo?arthritis[tiab])

**#7 #5 or #6**

#8 randomized[tiab]

#9 placebo[tiab]

#10 controlled[tiab]

#11 random\*[tiab]

#12 trial\*[tiab]

#13 groups[tiab]

#14 ((singl\*[tiab] or doubl\*[tiab] or tripl\*[tiab]) and (mask\*[tiab] or blind\*[tiab]))

**#15 #8 or #9 or #10 or #11 or #12 or #13 or #14**

**#16 #4 and #7 and #15**

### Embase search strategy

#1 'Pulsed electromagnetic field'/exp

#2 Pulsed electromagnetic fields:ti,ab

#3 Pulsed electromagnetic field: ti,ab

**#4 #1 or #2 or #3**

#5 osteoarthro\* or gonarthriti\* or gonarthro\* or coxarthriti\* or coxarthro\* or osteoarthritis:ti,ab

#6 'Osteoarthritis'/exp

**#7 #5 or #6**

#8 random\* or control\* or trial\* or placebo:ti,ab

#9 groups:ti,ab

#10 (singl\* or doubl\* or tripl\*) and (mask\* or blind\*):ti,ab

**#11 #8 or #9 or #10**

**#12 #4 and #7 and #11**

### Cochrane Library search strategy

#1 MeSH descriptor Pulsed electromagnetic field explode all trees

#2 Pulsed electromagnetic field:ti,ab,kw

**#3 #1 or #2**

#4 MeSH descriptor osteoarthritis explode all trees

#5 osteoarthro\* or gonarthriti\* or gonarthro\* or coxarthriti\* or coxarthro\* or osteo?arthritis:ti,ab,kw

**#6 #4 or #5**

#7 random\* or control\* or trial\* or placebo:ti,ab,kw

#8 Groups:ti,ab,kw

1  
2  
3 #9 (singl\* or doubl\* or tripl\*) and (mask\* or blind\*):ti,ab,kw

4 #10 #7 or #8 or #9

5 #11 #3 and #6 and #10

6  
7  
8 **Web of Science search strategy**

9 #1 Topic:(Pulsed electromagnetic field)

10 #2 Topic:(Pulsed electromagnetic fields)

11 #3 #1 or #2

12 #4 Topic:(Osteoarthritis)

13 #5 Topic:(osteoarthro\* or gonarthriti\* or gonarthro\* or coxarthriti\* or coxarthro\* or osteo?arthritis)

14 #6 #4 or #5

15 #7 Topic:(randomized or placebo or controlled or random\* or trial\* or groups)

16 #8 Topic:((singl\* or doubl\* or tripl\*) and (mask\* or blind\*))

17 #9 #7 or #8

18 #10 #3 and #6 and #9



# PRISMA 2009 Checklist

1  
2  
3  
4  
5  
6  
7  
8  
9  
10  
11  
12  
13  
14  
15  
16  
17  
18  
19  
20  
21  
22  
23  
24  
25  
26  
27  
28  
29  
30  
31  
32  
33  
34  
35  
36  
37  
38  
39  
40  
41  
42  
43  
44  
45  
46  
47

| Section/topic                      | #  | Checklist item                                                                                                                                                                                                                                                                                              | Reported on page #    |
|------------------------------------|----|-------------------------------------------------------------------------------------------------------------------------------------------------------------------------------------------------------------------------------------------------------------------------------------------------------------|-----------------------|
| <b>TITLE</b>                       |    |                                                                                                                                                                                                                                                                                                             |                       |
| Title                              | 1  | Identify the report as a systematic review, meta-analysis, or both.                                                                                                                                                                                                                                         | 1                     |
| <b>ABSTRACT</b>                    |    |                                                                                                                                                                                                                                                                                                             |                       |
| Structured summary                 | 2  | Provide a structured summary including, as applicable: background; objectives; data sources; study eligibility criteria, participants, and interventions; study appraisal and synthesis methods; results; limitations; conclusions and implications of key findings; systematic review registration number. | 2                     |
| <b>INTRODUCTION</b>                |    |                                                                                                                                                                                                                                                                                                             |                       |
| Rationale                          | 3  | Describe the rationale for the review in the context of what is already known.                                                                                                                                                                                                                              | 4                     |
| Objectives                         | 4  | Provide an explicit statement of questions being addressed with reference to participants, interventions, comparisons, outcomes, and study design (PICOS).                                                                                                                                                  | 4                     |
| <b>METHODS</b>                     |    |                                                                                                                                                                                                                                                                                                             |                       |
| Protocol and registration          | 5  | Indicate if a review protocol exists, if and where it can be accessed (e.g., Web address), and, if available, provide registration information including registration number.                                                                                                                               | Appendix 2            |
| Eligibility criteria               | 6  | Specify study characteristics (e.g., PICOS, length of follow-up) and report characteristics (e.g., years considered, language, publication status) used as criteria for eligibility, giving rationale.                                                                                                      | 5                     |
| Information sources                | 7  | Describe all information sources (e.g., databases with dates of coverage, contact with study authors to identify additional studies) in the search and date last searched.                                                                                                                                  | 4, 5                  |
| Search                             | 8  | Present full electronic search strategy for at least one database, including any limits used, such that it could be repeated.                                                                                                                                                                               | Details in Appendix 1 |
| Study selection                    | 9  | State the process for selecting studies (i.e., screening, eligibility, included in systematic review, and, if applicable, included in the meta-analysis).                                                                                                                                                   | 5                     |
| Data collection process            | 10 | Describe method of data extraction from reports (e.g., piloted forms, independently, in duplicate) and any processes for obtaining and confirming data from investigators.                                                                                                                                  | 5                     |
| Data items                         | 11 | List and define all variables for which data were sought (e.g., PICOS, funding sources) and any assumptions and simplifications made.                                                                                                                                                                       | 5                     |
| Risk of bias in individual studies | 12 | Describe methods used for assessing risk of bias of individual studies (including specification of whether this was done at the study or outcome level), and how this information is to be used in any data synthesis.                                                                                      | 5                     |
| Summary measures                   | 13 | State the principal summary measures (e.g., risk ratio, difference in means).                                                                                                                                                                                                                               | 6                     |
| Synthesis of results               | 14 | Describe the methods of handling data and combining results of studies, if done, including measures of consistency (e.g., $I^2$ ) for each meta-analysis.                                                                                                                                                   | 6                     |



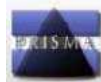

# PRISMA 2009 Checklist

| Section/topic                 | #  | Checklist item                                                                                                                                                                                           | Reported on page #     |
|-------------------------------|----|----------------------------------------------------------------------------------------------------------------------------------------------------------------------------------------------------------|------------------------|
| Risk of bias across studies   | 15 | Specify any assessment of risk of bias that may affect the cumulative evidence (e.g., publication bias, selective reporting within studies).                                                             | NA                     |
| Additional analyses           | 16 | Describe methods of additional analyses (e.g., sensitivity or subgroup analyses, meta-regression), if done, indicating which were pre-specified.                                                         | 6                      |
| <b>RESULTS</b>                |    |                                                                                                                                                                                                          |                        |
| Study selection               | 17 | Give numbers of studies screened, assessed for eligibility, and included in the review, with reasons for exclusions at each stage, ideally with a flow diagram.                                          | 7, details in figure 1 |
| Study characteristics         | 18 | For each study, present characteristics for which data were extracted (e.g., study size, PICOS, follow-up period) and provide the citations.                                                             | 7, details in table 1  |
| Risk of bias within studies   | 19 | Present data on risk of bias of each study and, if available, any outcome level assessment (see item 12).                                                                                                | 7, details in figure 5 |
| Results of individual studies | 20 | For all outcomes considered (benefits or harms), present, for each study: (a) simple summary data for each intervention group (b) effect estimates and confidence intervals, ideally with a forest plot. | 7-8                    |
| Synthesis of results          | 21 | Present results of each meta-analysis done, including confidence intervals and measures of consistency.                                                                                                  | 7-8                    |
| Risk of bias across studies   | 22 | Present results of any assessment of risk of bias across studies (see Item 15).                                                                                                                          | -                      |
| Additional analysis           | 23 | Give results of additional analyses, if done (e.g., sensitivity or subgroup analyses, meta-regression [see Item 16]).                                                                                    | 7                      |
| <b>DISCUSSION</b>             |    |                                                                                                                                                                                                          |                        |
| Summary of evidence           | 24 | Summarize the main findings including the strength of evidence for each main outcome; consider their relevance to key groups (e.g., healthcare providers, users, and policy makers).                     | 8-9                    |
| Limitations                   | 25 | Discuss limitations at study and outcome level (e.g., risk of bias), and at review-level (e.g., incomplete retrieval of identified research, reporting bias).                                            | 9-10                   |
| Conclusions                   | 26 | Provide a general interpretation of the results in the context of other evidence, and implications for future research.                                                                                  | 10                     |
| <b>FUNDING</b>                |    |                                                                                                                                                                                                          |                        |
| Funding                       | 27 | Describe sources of funding for the systematic review and other support (e.g., supply of data); role of funders for the systematic review.                                                               | 11                     |

From: Moher D, Liberati A, Tetzlaff J, Altman DG, The PRISMA Group (2009). Preferred Reporting Items for Systematic Reviews and Meta-Analyses: The PRISMA Statement. PLoS Med 6(7): e1000097. doi:10.1371/journal.pmed1000097

For more information, visit: [www.prisma-statement.org](http://www.prisma-statement.org).
