# Supplementary material for: Efficacy and safety of the pulsed electromagnetic field in osteoarthritis: a meta-analysis
Source: PubMed Central journal article supplement — BMJ Open. 2018 Dec 14;8(12):e022879. doi: 10.1136/bmjopen-2018-022879 (PMC6303578; doi:10.1136/bmjopen-2018-022879), 2018-12-14
Supplement: bmjopen-2018-022879supp001.pdf [file bmjopen-2018-022879supp001.pdf]

## Search Strategies

### PubMed search strategy

#1 Pulsed electromagnetic field[Title/Abstract]

#2 Pulsed electromagnetic fields[Title/Abstract]

#3 Pulsed electromagnetic field[mesh]

**#4 #1 or #2 or #3**

#5 Osteoarthritis[Mesh]

#6 (osteoarthro\*[tiab] or gonarthriti\*[tiab] or gonarthro\*[tiab] or coxarthriti\*[tiab] or coxarthro\*[tiab] or osteo?arthritis[tiab])

**#7 #5 or #6**

#8 randomized[tiab]

#9 placebo[tiab]

#10 controlled[tiab]

#11 random\*[tiab]

#12 trial\*[tiab]

#13 groups[tiab]

#14 ((singl\*[tiab] or doubl\*[tiab] or tripl\*[tiab]) and (mask\*[tiab] or blind\*[tiab]))

**#15 #8 or #9 or #10 or #11 or #12 or #13 or #14**

**#16 #4 and #7 and #15**

### Embase search strategy

#1 'Pulsed electromagnetic field'/exp

#2 Pulsed electromagnetic fields:ti,ab

#3 Pulsed electromagnetic field: ti,ab

**#4 #1 or #2 or #3**

#5 osteoarthro\* or gonarthriti\* or gonarthro\* or coxarthriti\* or coxarthro\* or osteoarthritis:ti,ab

#6 'Osteoarthritis'/exp

**#7 #5 or #6**

#8 random\* or control\* or trial\* or placebo:ti,ab

#9 groups:ti,ab

#10 (singl\* or doubl\* or tripl\*) and (mask\* or blind\*):ti,ab

**#11 #8 or #9 or #10**

**#12 #4 and #7 and #11**

### Cochrane Library search strategy

#1 MeSH descriptor Pulsed electromagnetic field explode all trees

#2 Pulsed electromagnetic field:ti,ab,kw

**#3 #1 or #2**

#4 MeSH descriptor osteoarthritis explode all trees

#5 osteoarthro\* or gonarthriti\* or gonarthro\* or coxarthriti\* or coxarthro\* or osteo?arthritis:ti,ab,kw

**#6 #4 or #5**

#7 random\* or control\* or trial\* or placebo:ti,ab,kw

#8 Groups:ti,ab,kw

#9 (singl\* or doubl\* or tripl\*) and (mask\* or blind\*):ti,ab,kw

#10 #7 or #8 or #9

#11 #3 and #6 and #10

### **Web of Science search strategy**

#1 Topic:(Pulsed electromagnetic field)

#2 Topic:(Pulsed electromagnetic fields)

#3 #1 or #2

#4 Topic:(Osteoarthritis)

#5 Topic:(osteoarthro\* or gonarthriti\* or gonarthro\* or coxarthriti\* or coxarthro\* or osteo?arthritis)

#6 #4 or #5

#7 Topic:(randomized or placebo or controlled or random\* or trial\* or groups)

#8 Topic:((singl\* or doubl\* or tripl\*) and (mask\* or blind\*))

#9 #7 or #8

#10 #3 and #6 and #9
